The oxidative stress response and virulence of pathogenic *Leptospira* are controlled by the  
interplay of two peroxide stress regulators

Short title: Identification of a second PerR-like regulator in pathogenic *Leptospira*.

Crispin Zavala-Alvarado<sup>1§#</sup>, Antony T. Vincent<sup>2</sup>, Odile Sismeiro<sup>3</sup>, Rachel Legendre<sup>3,4</sup>, Hugo  
Varet<sup>3,4</sup>, Giovanni Bussotti<sup>4</sup>, Céline Lorigou<sup>1</sup>, Jean-Yves Coppée<sup>3</sup>, Frédéric J. Veyrier<sup>2</sup>,  
Mathieu Picardeau<sup>1</sup>, and Nadia Benaroudj<sup>1\*</sup>

<sup>1</sup> Unité de Biologie des Spirochètes, Department of Microbiology, Institut Pasteur, Paris,  
France

<sup>2</sup> INRS-Centre Armand-Frappier, Bacterial Symbionts Evolution, Laval, Québec, Canada

<sup>3</sup> Biomix technological platform, Center for Technological Resources and Research, Institut  
Pasteur, Paris, France

<sup>4</sup> Bioinformatics and Biostatistics Hub, Department of Computational Biology, USR 3756  
CNRS, Institut Pasteur, Paris, France

<sup>§</sup> Université de Paris, Sorbonne Paris Cité, COMUE BioSPC, Paris 75013, France

<sup>#</sup> Current address: Microbial Individuality and Infection group, Department of Cell Biology  
and Infection, Institut Pasteur, Paris, France

\* Corresponding author, E-mail: [nadia.benaroudj@pasteur.fr](mailto:nadia.benaroudj@pasteur.fr) (NB)

Keywords: Microbiology; transcription regulation; reactive oxygen species (ROS); oxidative stress; virulence; leptospirosis; RNASeq; non-coding RNAs; *Leptospira*; Spirochetes; PerR; Fur

## Abstract

Pathogenic *Leptospira* are the causative agents of leptospirosis, the most widespread zoonotic infectious disease. Leptospirosis is a potentially severe and life-threatening emerging disease with highest burden in sub-tropical areas and impoverished populations. Mechanisms allowing pathogenic *Leptospira* to survive inside a host and induce acute leptospirosis are not fully understood. The ability to resist deadly oxidants produced by the host during infection is pivotal for *Leptospira* virulence. We have previously shown that genes encoding defenses against oxidants in *L. interrogans* are repressed by PerRA (encoded by LIMLP\_10155), a peroxide stress regulator of the Fur family. In this study, we describe the identification and characterization of another putative PerR-like regulator (LIMLP\_05620) in *L. interrogans*. Protein sequence and phylogenetic analyses indicated that LIMLP\_05620 displayed all the canonical PerR amino acid residues and is restricted to pathogenic *Leptospira* clades. We therefore named this PerR-like regulator PerRB. In *L. interrogans*, the PerRB regulon is distinct from that of PerRA. While a *perRA* mutant had a greater tolerance to peroxide, inactivating *perRB* led to a higher tolerance to superoxide, suggesting that these two regulators have a distinct function in the adaptation of *L. interrogans* to oxidative stress. The concomitant inactivation of *perRA* and *perRB* resulted in a higher tolerance to both peroxide and superoxide and, unlike the single mutants, to the loss of *Leptospira* virulence. Interestingly, this correlated with major changes in gene and non-coding RNA expression, only observed in the double *perRAperRB* mutant. Notably, several virulence-associated genes (*clpB*, *ligA/B*, and *lvrAB*) were repressed. By obtaining the first double mutant in a pathogenic

*Leptospira* strain, our study has uncovered for the first time the interplay of two PerRs, not only in the adaptation of *Leptospira* to oxidative stress, but also in their virulence and pathogenicity, most likely through the transcriptional control of a complex regulatory network.

## Author summary

Leptospirosis is a widespread infectious disease responsible for over one million of severe cases and 60 000 fatalities annually worldwide. This neglected and emerging disease has a worldwide distribution, but it mostly affects populations from developing countries in sub-tropical areas. The causative agents of leptospirosis are pathogenic bacterial *Leptospira* spp. There is a considerable deficit in our knowledge of these atypical bacteria, including their virulence mechanisms. In addition to the *Leptospira* PerRA regulator that represses defenses against peroxide, we have identified and characterized a second PerR regulator in pathogenic *Leptospira* species (PerRB) that participates in *Leptospira* tolerance to superoxide. Phenotypic and transcriptomic analyses of single PerRA and PerRB mutants suggest that the two PerRs fulfill distinct functions in the adaptation to oxidative stress. However, concomitant inactivation of PerRA and PerRB resulted in a higher tolerance to both peroxide and superoxide, but to a loss virulence.

The absence of the two PerR regulators resulted in global and major changes in the transcriptional profile, including a dramatic decrease of several virulence factor expression. Our study has demonstrated that PerRA and PerRB cooperate to orchestrate a complex regulatory network involved in *Leptospira* virulence.

## Introduction

Pathogenic *Leptospira* spp. are aerobic Gram-negative bacteria of the spirochetal phylum that are the causative agents of leptospirosis, the most widespread zoonosis [1]. More than one million cases of leptospirosis are currently reported annually in the world, with 10% of mortality [2]. This disease is considered as a health threat among impoverished populations in developing countries under tropical areas [2], but the number of reported cases of leptospirosis are also on the rise in developed countries under temperate climates [3]. Rodents are asymptomatic reservoir for leptospires as the bacteria colonize the proximal renal tubules of these animals. Leptospires are shed in the environment through the urine of infected animals and leptospirosis is transmitted to other animal species and humans mostly by exposure to contaminated soils and water. *Leptospira* penetrate an organism through abraded skins and mucous membranes, subsequently disseminate within the bloodstream and rapidly spread to multiple tissues and organs (including kidney, liver, lungs). Clinical manifestations range from a mild flu-like febrile state to more severe and fatal cases leading to hemorrhages and multiple organ failure. Because of the lack of efficient tools for genetic manipulation of *Leptospira* spp. and their fastidious growth in the laboratory conditions, our understanding of the mechanism of pathogenicity and virulence as well as the basic biology of these pathogens have been greatly hampered [4,5].

During their life cycle, most bacteria will be exposed to reactive oxidative species (ROS), such as superoxide anion ( $\text{O}_2^-$ ) and hydrogen peroxide ( $\text{H}_2\text{O}_2$ ), that are produced endogenously or encountered in the environment [6]. The superoxide is formed during the aerobic respiratory chain upon the reduction of the dioxygen ( $\text{O}_2$ ). Dismutation of superoxide will give rise to  $\text{H}_2\text{O}_2$  which, in turn, can react with ferrous iron to generate the highly reactive hydroxyl radicals ( $\text{OH}^\bullet$ ) through the Fenton reaction. These ROS are also produced

together with hypochlorous acid (HOCl), and nitric oxide anion ( $\cdot\text{NO}$ ) as powerful and efficient weapons by eukaryotic innate immune response upon infection by pathogenic bacteria [7]. ROS cause oxidative damage to cellular components (proteins, DNA and lipids) and this would result in bacterial death if bacteria had not developed scavenging enzymes to counteract the deadly effect of ROS, including catalase, peroxidases and superoxide dismutase or reductase (SOD, SOR). Indeed, in response to any increase in ROS concentration, as occurred during environmental oxidative stress or when infecting a host, bacteria trigger an adaptive response allowing the fine-tuning of scavenging enzyme synthesis rate that appropriately adapts the defenses against ROS to the oxidant assault. ROS production is increased upon infection by *Leptospira* [8] and with the development of severe leptospirosis in patients and infected animals [9,10]. In fact, the ability to detoxify  $\text{H}_2\text{O}_2$  is essential for *Leptospira* virulence as inactivation of the catalase-encoding gene led to virulence attenuation in *L. interrogans* [11].

The oxidative stress adaptive response in bacteria is controlled by specialized ROS sensing transcription factors. OxyR and PerR are the main peroxide-sensing regulators found in Gram-negative and Gram-positive bacteria, respectively [12]. OxyR and PerR are functional equivalents but they do control expression of peroxide scavenging enzymes by different mechanisms. OxyR is a transcriptional regulator from the LysR family. Tetrameric OxyR binds promoters and activates the expression of genes coding for catalase and peroxidases through the oxidation of its  $\text{H}_2\text{O}_2$  sensing cysteine residue [13,14]. PerR belongs to the Fur (Ferric uptake regulator) transcriptional factor family. It is a metalloprotein that binds DNA in the presence of iron or manganese and represses the expression of catalase and peroxidases [15–17]. In the presence of peroxide, PerR is oxidized on the histidine residues participating in iron coordination, PerR dissociates from DNA and peroxide-scavenging enzyme repression is alleviated [18,19]. In Gram-negative bacteria, SOD expression is controlled by the SoxRS

system [20,21] by a redox-sensing mechanism and oxidation of a Fe-S cluster [22]. In Gram-positive bacteria, SOD expression regulation probably involves the alternative Sigma Factor SigB among other mechanisms [23]. Pathogenic *Leptospira* spp. are among the few examples of Gram-negative bacteria where the expression of peroxide-scavenging enzymes is regulated by a PerR (encoded by LIMLP\_10155/LIC12034/LA1857) and not an OxyR [24]. Moreover, their genomes do not contain any ORF encoding a SOD and they do not exhibit canonical SOD activity [25,26].

We have very recently characterized the transcriptional response to hydrogen peroxide in the pathogen *L. interrogans* and shown that these bacteria respond to sublethal H<sub>2</sub>O<sub>2</sub> concentration by increasing the expression of catalase and of two peroxidases (Alkylperoxiredoxin (AhpC) and Cytochrome C peroxidase (CCP)) [27]. When *Leptospira* were exposed to deadly H<sub>2</sub>O<sub>2</sub> concentration, additional enzymes with a putative role as antioxidants and/or in repair of oxidized cysteines in proteins were up-regulated, including several thiol oxidoreductases (thioredoxin, glutaredoxin, DsbD, and Bcp-like proteins) [27]. Several genes of the LexA regulon (*recA*, *recN*, *dinP*) and other genes with putative role in DNA repair (*mutS*, *radC*) had a higher expression as well as genes encoding for canonical chaperones (*dnaK/dnaJ/grpE*, *groES/EL*, and *hsp15/20*) [27]. Only genes coding for the catalase and peroxidases were under the control of PerR and our study has revealed a complex regulatory network independent of PerR involving other transcriptional regulators, sigma factors, two component systems and non-coding RNAs [27]. During the course of this study, we noticed that an ORF encoding a Fur-like regulator (LIMLP\_05620/LIC11158/LA2887) was up-regulated when *Leptospira* were exposed to a deadly concentration of H<sub>2</sub>O<sub>2</sub>. Here, we report the functional characterization of this pathogenic *Leptospira*-specific Fur-like regulator in the adaptation of *Leptospira* to oxidative stress. Phenotypic analyses of a mutant inactivated in LIMLP\_05620 indicates a role of this Fur-like regulator in *Leptospira* tolerance

147 to superoxide. This, together with the presence of the canonical amino acid residues of the  
 148 PerR DNA binding helix and H<sub>2</sub>O<sub>2</sub> sensitivity, strongly suggest that LIMLP\_05620 encodes a  
 149 second PerR-like regulator in pathogenic *Leptospira* species. By obtaining a double mutant  
 150 where LIMLP\_05620 and *perR* (LIMLP\_10155) are concomitantly inactivated, we have also  
 151 investigated the interplay between these two PerR-like regulators in the adaptation to  
 152 oxidative stress and virulence of *L. interrogans*. We have demonstrated a cooperation of  
 153 LIMLP\_05620 with PerR in controlling several *Leptospira* virulence-associated genes,  
 154 including *ligA*, *ligB*, *lvrAB*, and *clpB*, perhaps illustrating the importance of functional  
 155 redundancy in pathogenic *Leptospira* virulence and pathogenicity.

## Results

### Identification of an ORF that encodes a novel putative PerR regulator in pathogenic *Leptospira* species.

Regulators of the Fur family are homodimeric metalloproteins with a two-domain organization composed of an amino-terminal DNA binding domain and a carboxy-terminal dimerization domain (Fig 1A). The DNA binding domain contains a winged helix-turn-helix (HTH) DNA binding motif (H2-H4, in Fig1A) where DNA binding is mediated by the H4 helix. The dimerization domain consists of an  $\alpha/\beta$  domain. The regulatory iron that controls DNA binding and dissociation is coordinated by histidine, aspartate, and glutamate residues located in a loop at the hinge of the amino and carboxy-terminal domains. Most of Fur-like regulators also coordinate a structural metal (zinc) through 2 cysteine motifs (CxxC, where x designates any AA). This structural metal allows correct folding and dimeric assembly of the regulator.

Due to a great conservation in protein folding, metal coordination and similarity in the metal-induced conformational switch controlling DNA binding, it is difficult to distinguish members of the Fur family on the sole basis of their primary sequence. However, in *B. subtilis*, a single amino acid residue in the H4 helix of the amino-terminal DNA binding domain (N61 and R61 for *B. subtilis* PerR and Fur, respectively) allows PerR and Fur to discriminate between their respective DNA sequence targets (PerR and Fur boxes, respectively) [28] (Fig 1B). In addition, D104 residue in the carboxy-terminal domain is pivotal in the PerR sensitivity to H<sub>2</sub>O<sub>2</sub>. The corresponding residue in Fur is a glutamate and mutating this residue in aspartate leads to H<sub>2</sub>O<sub>2</sub> sensitivity [29] (Fig 1B). Therefore, N61 and D104 both allow to differentiate a PerR from a Fur in *B. subtilis* and the presence of these



canonical amino acid residues in PerR sequences is well-conserved in other bacterial species [28,29].

*L. interrogans* genome encodes 4 ORFs that share homology with regulators of the Fur family. Among those *Leptospira* Fur-like regulators, LIMLP\_10155 is the only *Leptospira* Fur-like regulator that is functionally and structurally characterized. It encodes a PerR that represses genes encoding defenses against peroxide, including catalase and other peroxidases [24,27,30]. Our previous structural characterization of the PerR from *L. interrogans* indicates that this member of the Fur family lacks a structural metal binding site despite a correct folding and functional dimeric assembly [30].

Sequence alignment of these ORFs with the Fur and PerR from *B. subtilis* shows a good conservation of the two-domain organization and residues involved in the regulatory metal coordination (Fig 1B). Interestingly, two of the 4 Fur-like ORFs of *L. interrogans*, LIMLP\_10155 (LIC12034/LA1857 encoding a PerR) and LIMLP\_05620 (LIC11158/LA2887), exhibit the canonical asparagine (N60 and N68, respectively) and aspartate (D103 and D112, respectively) residues of a typical PerR. The third ORF encoding a putative Fur-like regulator, LIMLP\_04825 (LIC11006/LA3094), possesses the two Fur typical residues, R76 and E121, respectively. The fourth ORF encoding a putative Fur-like regulator, LIMLP\_18590 (LIC20147/LB183) possesses the typical Fur arginine residue in its putative H4 DNA binding helix (R51) but a typical PerR aspartate residue in the carboxy-terminal domain (D94). Of note, LIMLP\_18590 has a glutamate residue at the position 96. Fold prediction suggests that the three Fur regulators encoded by LIMLP\_05620, LIMLP\_04825 and LIMLP\_18590 adopt the two-domain organization typical of the Fur family depicted in the crystal structure of LIMLP\_10155 (Fig 1C).

The closest relative of the PerR-encoding LIMLP\_10155 is LIMLP\_05620 with about 26% of sequence identity, and LIMLP\_04825 and LIMLP\_18590 are closest relatives that share 20%

of sequence identity. LIMLP\_05620 shares about 27% identity with the well-characterized *B. subtilis* PerR. The putative H4 helix in LIMLP\_05620 (Leu63-Ser75) is relatively well conserved with that of *B. subtilis* (Val56-Ser69) (Fig1B-C) and LIMLP\_05620 displays a typical regulatory metal coordination site (His44-Asp93-His99-His101-Asp112). As the LIMLP\_10155-encoded PerR, LIMLP\_05620 lacks the cysteinate motif involved in structural metal coordination [30] (Fig 1B). On the contrary, both LIMLP\_04825 and LIMLP\_18590 have one or two cysteinate motifs for structural metal coordination (C<sub>113</sub>xxC<sub>116</sub> and C<sub>86</sub>xxC<sub>89</sub>-C<sub>122</sub>xxC<sub>125</sub>, respectively). Therefore, LIMLP\_05620 encodes a putative PerR-like regulator closely related to the PerR-encoding LIMLP\_10155 whereas LIMLP\_04825 and LIMLP\_18590 could encode other type of Fur-like regulators (Fur, Zur, or Nur). We therefore annotated the LIMLP\_10155 and LIMLP\_05620 ORFs as *perRA* and *perRB*, respectively.

### **Phylogenetic analysis of PerRA and PerRB in *Leptospira* species.**

To get a better understanding of the evolutionary relationship of the four Fur-like regulators in pathogenic *Leptospira*, we undertook phylogenetic analyses by searching for homologous sequences of the LIMLP\_10155, LIMLP\_05620, LIMLP\_18590 and LIMLP\_04825 proteins among the representative genomes present in GenBank. This revealed a large phylogenetic distribution with several branches (Fig 2A). The sequences homologous to the LIMLP\_04825 and LIMLP\_18590 proteins form two distinct groups (red and orange, respectively) separated by a common ancestor. To get better definition of phylogenetic relationships of PerR-like homologues, we performed analysis with only a subset of sequence (Fig 2B). This phylogenetic analysis shows two separated groups composed of the sequences of LIMLP\_10155 (PerRA) and LIMLP\_05620 (PerRB) (see S1Fig for a more complete and detailed tree).

The sequences of LIMLP\_10155 and LIMLP\_05620 ORFs from the strain *L. interrogans* serovar Manilae were searched and compared in all available genomes from the *Leptospira* genus (S1 Table). As seen in Fig 3, LIMLP\_10155 is present in the saprophytes S1 and S2 clades and in the P1 clade (highly virulent strains). This ORF is absent from most of the P2 clade (intermediate strains). However, there are two exceptions in the P2 clade species since homologues of LIMLP\_10155, which might have been acquired by a recent horizontal gene transfer, are present in *L. dzoumognesis* and *L. wolffii*. Additionally, this ORF is also present in other bacteria from the order *Leptospirales* such as *Turneriella parva* and *Leptonema illini* (Fig 2B). This suggests that LIMLP\_10155 (PerRA) was present in *Leptospirales* ancestor before *Leptospira* divergence and lost in the P2 clade. On the other side, LIMLP\_05620 ORF is only present in P1 and P2 clades and absent in all species from S1 and S2 clades (Fig 3). LIMLP\_05620 is also not found in other bacteria from the *Leptospirales* order (Fig 2B and S1 Fig). This restricted distribution suggests that the ancestor of pathogenic strains (P1 and P2 clades) has likely acquired LIMLP\_05620 after their divergence with other *Leptospira*. Overall, both PerR-encoding LIMLP\_10155 and LIMLP\_05620 ORFs only coexist in P1 clade that comprises the highly virulent *Leptospira* species. Altogether, these findings indicate that pathogenic *Leptospira* strains encode a second putative PerR-like regulator that is absent in saprophytes.

#### **Role of PerRB in *L. interrogans* tolerance to ROS.**

As demonstrated previously [27], when *L. interrogans* are exposed to a sublethal dose of H<sub>2</sub>O<sub>2</sub> (10 µM for 30 min) *perRA* expression is increased by a 7-fold whereas that of *perRB* is unchanged (Fig 4). In the presence of a higher dose of H<sub>2</sub>O<sub>2</sub> (1 mM for 1h), expression of both *perRA* and *perRB* was increased significantly by a 6-fold (Fig 4). This suggests that PerRB, like PerRA, responds to deadly H<sub>2</sub>O<sub>2</sub> dose.

We have previously shown that inactivating *perRA* led to the derepression of *katE*, *ahpC* and *ccp* and to a higher tolerance to H<sub>2</sub>O<sub>2</sub> [27,30] (see S2 Fig). The *perRA* mutant exhibited a reduced ability to grow in the presence of the superoxide-generating compound paraquat [30]. A mutant with a transposon inserted into the PerRB-encoding LIMLP\_05620 ORF was available in our random transposon mutant library and was used to investigate *L. interrogans* tolerance of ROS in the absence of PerRB. When cultivated in EMJH medium, the *perRB* mutant did not reach the same density than the WT strain at stationary phase (Fig 5A and S2 Fig). Inactivating *perRB* did not have any effect on the ability of *L. interrogans* to tolerate deadly concentration of H<sub>2</sub>O<sub>2</sub> (S2 Fig); however, it increases the capability of *Leptospira* to grow in the presence of paraquat (Fig 5B). Complementation in trans the *perRB* mutant restored the WT strain phenotype in the absence of paraquat (Fig 5A) and it decreased the growth rate of the cells to a somehow lower level than that of the WT in the presence of paraquat (Fig 5B). This indicates that PerRB is involved in *Leptospira* tolerance to superoxide, very likely by repressing (directly or indirectly) defenses against this ROS. Therefore, PerRA and PerRB have distinct function in pathogenic *Leptospira* survival in the presence of oxidants.

## Identification of differentially-expressed genes upon *perRB* inactivation.

To understand the role of PerRB in *L. interrogans* tolerance to ROS, we compared the global transcriptional profiles of the *perRB* mutant and WT strains. Differential gene expression analysis revealed changes in the transcription of 123 genes, with 59 and 64 down- and up-regulated, respectively (see S2 Table for a complete set of data). However, *perRB* inactivation did not lead to dramatic changes in gene expression as the majority of Log<sub>2</sub>FC (108 out of 123) ranged between -1 and 1 (S2 Table). These findings indicate that the absence of an active PerRB did not lead to substantial significant changes in genes expression when

280 *Leptospira* are cultivated in the laboratory conditions (in EMJH medium at 30°C) and during  
 281 the exponential phase.  
 282 Nevertheless, when examining the nature of the highest differentially-expressed genes in the  
 283 *perRB* mutant, some tendencies could be observed. Many of the differentially-expressed  
 284 ORFs were annotated as protein with unknown function and did not have homologs in the  
 285 saprophyte *L. biflexa* strain (S2 Table and Table 1).

| ORF ID <sup>a</sup>                       | Gene        | <i>L. biflexa</i> <sup>b</sup> | Function                                                     | Log2FC | Adjusted p-value |
|-------------------------------------------|-------------|--------------------------------|--------------------------------------------------------------|--------|------------------|
| <b>Down-regulated genes</b>               |             |                                |                                                              |        |                  |
| LIMLP_02490* (LIC12988/LA0587)            |             | <i>LEPBI_I0886</i>             | Lipase putative extracellular lipoprotein                    | -1.608 | 6.11e-04         |
| LIMLP_02845 (LIC12920)                    |             |                                | Hypothetical                                                 | -1.084 | 3.46e-02         |
| LIMLP_03640** (LIC12763/LA0865)           |             |                                | Hypothetical                                                 | -1.102 | 1.06e-02         |
| LIMLP_03790* (LIC12736/LA0905)            |             |                                | Hypothetical                                                 | -1.244 | 1.42e-05         |
| <b>LIMLP_04255 (LIC10892/LA3244)</b>      | <i>exbB</i> | LEPBI_I0149                    | Biopolymer transport protein ExbB/TolQ                       | -0.947 | 1.07e-02         |
| LIMLP_06190** (LIC11265/LA2751)           |             | LEPBI_I3113                    | Disulfide oxidoreductase                                     | -0.723 | 6.96e-03         |
| LIMLP_11400** (LIC12297/LA1456)           | <i>radC</i> |                                | DNA repair protein RadC                                      | -0.619 | 1.17e-02         |
| LIMLP_13165** (LIC12631/LA1029)           | <i>sph2</i> |                                | Sphingomyelinase C                                           | -1.152 | 8.10e-03         |
| LIMLP_14595* (LIC10628/LA3571)            |             | LEPBI_I2694                    | Cytochrome oxidase CcoP subunit                              | -0.583 | 3.40e-02         |
| LIMLP_14715** (LIC10606/LA3598)           | <i>dps</i>  | <i>LEPBI_I2540</i>             | DNA-binding stress protein Dps                               | -0.896 | 1.61e-03         |
| <b>LIMLP_15470** (LIC10454/LA3793)</b>    |             | LEPBI_I0671                    | Hemolysin (N-acyltransferase domain)                         | -1.317 | 3.40e-03         |
| LIMLP_15890 (LIC10377/LA0430)             |             |                                | Hypothetical putative lipoprotein                            | -1.353 | 3.90e-10         |
| LIMLP_16695 (LEPIC3326/LA4096)            |             |                                | Hypothetical                                                 | -1.124 | 8.14e-04         |
| <b>LIMLP_18235** (LIC20078/LB099)</b>     |             |                                | Hypothetical                                                 | -1.098 | 1.69e-02         |
| <b>Up-regulated genes</b>                 |             |                                |                                                              |        |                  |
| LIMLP_02880* (LIC12912/LA0688)            | <i>cas5</i> |                                | CRISPR-associated protein Cas5                               | 0.881  | 5.84e-03         |
| LIMLP_02885* (LIC12911-12910/LA0689-0690) | <i>cas3</i> |                                | CRISPR-associated protein Cas3                               | 0.834  | 4.51e-03         |
| LIMLP_04075** (LIC12680/LA0974)           |             |                                | Adhesin/FimH-like protein/DuF1566 domain                     | 1.110  | 4.29e-03         |
| LIMLP_05450* (LIC11125/LA2933)            |             |                                | Diguanylate cyclase                                          | 0.983  | 2.12e-04         |
| LIMLP_05455* (LIC11126/LA2932)            |             |                                | Diguanylate cyclase                                          | 0.757  | 1.81e-02         |
| LIMLP_05460* (LIC11127/LA2930)            |             |                                | Diguanylate cyclase                                          | 0.922  | 1.11e-03         |
| LIMLP_05480 (LA2928)                      |             |                                | Hypothetical                                                 | 0.968  | 2.67e-02         |
| LIMLP_05485** (LIC11131/LA2926)           |             |                                | Diguanylate cyclase                                          | 0.679  | 8.14e-04         |
| LIMLP_05845 (LIC11203/LA2827)             |             |                                | Diguanylate phosphodiesterase                                | 0.608  | 3.85e-02         |
| LIMLP_09580 (LIC11921/LA1980)             |             | LEPBI_I1269                    | Diguanylate phosphodiesterase                                | 0.547  | 1.61e-02         |
| LIMLP_17875 (LIC20015/LB017)              | <i>hemN</i> | <i>LEPBI_I1166</i>             | Coproporphyrinogen III oxidase HemN                          | 0.727  | 9.53e-03         |
| LIMLP_18375** (LIC20106/LB133)            |             |                                | Diguanylate phosphodiesterase                                | 0.593  | 1.99e-02         |
| LIMLP_18755 (LIC20176/LB225)              |             |                                | Hypothetical putative lipoprotein                            | 1.453  | 3.77e-04         |
| LIMLP_18760 (LIC20177/LB226)              |             |                                | Adhesin/FimH-like protein/ DUF1566 domain-containing protein | 1.095  | 3.39e-02         |
| LIMLP_19320* (LA1770)                     |             |                                | AraC family transcriptional regulator                        | 1.279  | 4.51e-03         |
| LIMLP_19325* (LA1771)                     |             |                                | Hypothetical                                                 | 1.262  | 4.05e-02         |

287

288 **Table 1. Differentially-expressed ORFs upon *perRB* inactivation**

289 Selected up-and down-regulated genes in the LIMLP\_05620 (*perRB*) mutant with an adjusted p-value cutoff of 0.05.

290 <sup>a</sup> Gene numbering is according to Satou *et al* [31]. Corresponding genes of *L. interrogans* serovar Lai strain 56601 and serovar Copenhageni  
291 Fiocruz strain L1-130 are indicated in parenthesis.

292 <sup>b</sup> Closest ortholog in the saprophytes *L. biflexa* serovar Patoc strain Patoc1. The absence of syntheny is indicated in italic.

293 Genes that are down-regulated upon *perRA* inactivation as determined previously [27] are indicated in bold.

294 Down (\*) and up (\*\*) -regulated genes upon exposure to lethal H<sub>2</sub>O<sub>2</sub> dose as determined previously [27].

295 Among the highest up-regulated genes, two ORFs (LIMLP\_04075 and LIMLP\_18760)  
 296 encoded lipoproteins with a putative adhesin function. These proteins contain DUF1566  
 297 domain repeats which is also share by Lsa25, a *Leptospiral* surface adhesin that binds  
 298 extracellular matrix (ECM) [32].

299 Several genes involved in the metabolism of c-di GMP were differentially-expressed upon  
 300 *perRB* inactivation. C-di GMP is a secondary messenger in bacteria that regulates a variety of  
 301 processes such as biofilm formation, motility, stress adaptation, and virulence. C-di GMP  
 302 synthesis is catalyzed by diguanylate cyclases (DGCs) whereas its hydrolysis is catalyzed by  
 303 phosphodiesterases (PDEs). DGCs and PDEs are numerous in pathogenic *Leptospira*,  
 304 suggesting that c-di GMP fulfills an important role in sensing environmental signals when  
 305 *Leptospira* infect and colonize a host. C-di GMP has been recently shown to regulate biofilm  
 306 formation, motility and protection against environmental stress in pathogenic *Leptospira* [33].

307 Four DGCs (LIMLP\_05450, LIMLP\_05455, LIMLP\_05460, LIMLP\_05485) were up-  
 308 regulated upon *perRB* inactivation (Table 1). These DGC-encoding ORFs are located in a  
 309 gene cluster (LIMLP\_05485-05450) that contains 7 ORFs coding for DGCs. LIMLP\_05450,  
 310 LIMLP\_05455, LIMLP\_05460, and LIMLP\_05485 display the typical diguanylate cyclase  
 311 GGDEF and sensory PAS domains. A DGC activity was demonstrated *in vitro* for  
 312 LIMLP\_05450, LIMLP\_05455, LIMLP\_05460 [34]. Three PDE-encoding ORFs  
 313 (LIMLP\_05845, LIMLP\_9580, and LIMLP\_18375) were also up-regulated in the *perRB*  
 314 mutant.

315 LIMLP\_13165 was among the most down-regulated ORFs when *perRB* was inactivated. It  
 316 encodes a secreted protein with sphingomyelinase C and hemolytic activities [35]. Another  
 317 significantly down-regulated ORF encoded a protein with an acyl CoA acetyl tranferase  
 318 domain annotated as a putative hemolysin (LIMLP\_15470). This ORF is up-regulated when  
 319 *L. interrogans* is cultivated in DMC implemented in rats [36].



320 An ORF encoding an AraC transcriptional regulator (LIMLP\_19320), and two ORFs of  
321 unknown function (LIMLP\_18755 and 19325) were among the most up-regulated. The  
322 orthologs of LIMLP\_19320 and LIMLP\_19325 in *L. interrogans* serovar Lai belongs to a  
323 genomic island (Lai GI B, LA1747-1851) that can excise from the chromosome and form an  
324 independent replicative plasmid [37,38].

325 Among the down-regulated genes, several ORFs encode factors related to oxidative stress.  
326 LIMLP\_04255 is part of a gene cluster (LIMLP\_04240-04285) which code for a putative  
327 TonB-dependent transport system repressed by PerRA. We have previously shown that some  
328 genes of this cluster (LIMLP\_04245, LIMLP\_04270 and LIMLP\_04280) are involved in *L.*  
329 *interrogans* tolerance to superoxide [27]. LIMLP\_11400 encodes the DNA repair protein  
330 RadC and LIMLP\_14715 is a homolog of the *E. coli* Dps, a protein that sequesters iron and  
331 protects DNA from oxidative damage. LIMLP\_06190 encodes a putative disulfide  
332 oxidoreductase with the N-terminal ScdA domain (DUF1858). In *S. aureus*, ScdA is a di-iron  
333 protein involved in repair of oxidatively damaged iron-sulfur cluster proteins [39].  
334 LIMLP\_14595 encodes a putative transmembrane lipoprotein with a cytochrome-like domain  
335 that shows homology with the CcoP subunit of the cytochrome C oxidase and could function  
336 in the respiratory chain or be an enzyme cofactor.

337 Only 7 out of the 123 differentially-expressed genes in the *perRB* mutant were also  
338 differentially-expressed upon *perRA* inactivation with a similar inclination (S3 Fig) [27].  
339 LIMLP\_02010 and LIMLP\_04325 were up-regulated whereas LIMLP\_04255,  
340 LIMLP\_11810, LIMLP\_14225, LIMLP\_15470 and LIMLP\_18235 were down-regulated in  
341 the two mutants.

342 Notably, 82 out of the 123 differentially-expressed ORFs in the *perRB* mutant were also  
343 differentially-expressed upon exposure of *L. interrogans* to H<sub>2</sub>O<sub>2</sub> (S3 Fig) [27]. Thus, 66% of  
344 the PerRB regulon is also regulated by the presence of H<sub>2</sub>O<sub>2</sub>. Interestingly, the majority of

ORFs down-regulated in the *perRB* mutant, including the RadC and the Dps-encoding ORFs, were up-regulated in the presence of H<sub>2</sub>O<sub>2</sub> (with Log<sub>2</sub>FCs of 3.46 and 1.10, respectively) (S3 Fig and Table 1). On the contrary, many up-regulated ORFs in the *perRB* mutant had a lower expression in the presence of H<sub>2</sub>O<sub>2</sub>. For instance, the ORFs that code for Cas5 (LIMLP\_02880), Cas3 (LIMLP\_02885), and two DGCs (LIMLP\_05450 and LIMLP\_05455) were down-regulated upon exposure to H<sub>2</sub>O<sub>2</sub> with Log<sub>2</sub>FCs lower than -1.21 (S3 Fig and Table 1).

### **Concomitant inactivation of *perRA* and *perRB* leads to a higher resistance to ROS but to a lower virulence**

In order to investigate whether PerRA and PerRB cooperate in regulating the adaptive response to ROS, we inactivated *perRA* by allelic exchange in the *perRB* mutant (S4 Fig). This allowed obtaining a double *perRAperRB* mutant in a *L. interrogans* strain, the first double mutant constructed in a pathogenic *Leptospira*.

The double *perRAperRB* mutant had a growth rate comparable to that of the single *perRA* and *perRB* mutants and WT strains when *L. interrogans* were cultivated in EMJH medium (Fig 6A). However, entry in exponential phase was delayed if the culture medium was inoculated with stationary phase-adapted *perRAperRB* mutant (S5 Fig). We had already shown that a *perRA* mutant had a higher ability to grow and survive in the presence of deadly concentration of H<sub>2</sub>O<sub>2</sub> but a slower growth in the presence of the superoxide-generating paraquat ([30], and see in S2 Fig and Figs 6B and 6C). On the contrary, inactivating *perRB* leads to a higher resistance to paraquat (Fig 5 and Fig 6C). The concomitant inactivation of *perRA* and *perRB* led to a greater growth in the presence of both H<sub>2</sub>O<sub>2</sub> (Fig 6B) and paraquat (Fig 6C). To complement the double *perRAperRB* mutant strain, the PerRB-encoding ORF LIMLP\_05620 was expressed in trans using the replicative pMaORlgenta vector (S4 Fig). The growth of the

trans-complemented *perRAperRB* mutant resumed to an impaired growth, as that of the WT and single *perRA* mutant strains, in the presence of paraquat (Fig 6D). Therefore, the double *perRAperRB* mutant exhibited cumulative phenotypes of the respective single *perRA* and *perRB* mutants when *L. interrogans* are cultivated in the presence of ROS.

We then tested whether *perRA* and *perRB* inactivation had any influence on *L. interrogans* virulence in the animal model of acute leptospirosis. All hamsters infected intraperitoneally with  $10^4$  bacteria of the *perRA* or *perRB* single mutant strains exhibited morbidity sign after 7-8 days (Fig 6E), similarly to the WT strain. In contrast, all animals infected intraperitoneally with  $10^4$  bacteria of the double *perRAperRB* mutant strain did not show any sign of morbidity three weeks post-infection (Fig 6E), even when the animals were infected with  $10^6$  bacteria of the double *perRAperRB* mutant strain (Fig 6F). Virulence was restored in the double *perRAperRB* mutant strain complemented in trans only with *perRB* (Fig 6F). Therefore, the concomitant inactivation of *perRA* and *perRB* resulted in a loss of virulence in *L. interrogans* and expressing only *perRB* in the double mutant restored *Leptospira* virulence. Altogether, these results demonstrate that despite a higher resistance to ROS, the double *perRAperRB* mutant exhibited a dramatically reduced virulence.

### **Concomitant inactivation of *perRA* and *perRB* has a pleiotropic effect in *L. interrogans* gene expression.**

To further understand the interplay between PerRA and PerRB in controlling the oxidative stress response and virulence in *L. interrogans*, we performed RNA-Seq experiments on the double *perRAperRB* mutant and compared its transcriptomic profile with that of WT and single *perRA* and *perRB* mutant strains.

949 and 1024 ORFs were down- and up-regulated, respectively, in the double *perRAperRB* mutant (Fig 7A and see S3 Table for a complete set of data). Therefore,

concomitant *perRA* and *perRB* inactivation resulted in differential expression of almost half of the total coding sequences of *L. interrogans*; in comparison, only about 1% and 3% of the total coding sequences of *L. interrogans* were differentially-expressed in the single *perRA* and *perRB* mutants, respectively (S2 Table) [27]. Volcano scatter plot representation indicated not only a higher magnitude of fold changes but also a greater statistical significance in the double *perRAperRB* mutant (Fig 7B-D).

Most of the differentially-expressed ORFs in the *perRA* mutant were also differentially-expressed in the double *perRAperRB* mutant (Fig 7A). Many genes of the LIMLP\_04240-04280 cluster encoding a putative TonB-dependent transport system, the two-component system VicKR (LIMLP\_16720-16725), a putative hemolysin (LIMLP\_15470) and several ORFs of unknown function (from LIMLP\_14190 to LIMLP\_14225) were down-regulated in the *perRA* [24,27] and *perRAperRB* mutants (Fig 7 and 8A, S4 Table). Likewise, the ORFs encoding the catalase, AhpC and CCP (LIMLP\_10145, LIMLP\_05955 and LIMLP\_02795, respectively), that are repressed by PerRA and up-regulated in the single *perRA* mutant [24,27], were also up-regulated in the double *perRAperRB* mutant (Fig 7 and 8B, S5 Table).

21 and 27 ORFs that are respectively down- and up-regulated in the *perRB* mutant were also down- and up-regulated in the *perRAperRB* mutant (Fig 7A). LIMLP\_11400 (encoding RadC), LIMLP\_04255, encoding ExbB of the TonB-dependent transport system, the hemolysin-encoding ORF LIMLP\_15470, and LIMLP\_15890 were down-regulated in the single *perRB* and double *perRAperRB* mutants (Fig 7 and S2-S4 Tables).

Interestingly, the vast majority of the differentially-expressed ORFs in the double *perRAperRB* mutant did not exhibit any change in their expression in the single *perRA* and *perRB* mutants. For instance, of the DGCs and PDEs that were up-regulated in the *perRB* mutant, only LIMLP\_09580 was up-regulated in the double *perRAperRB* mutant (S2, S3 and S5 Tables). In fact, the *perRAperRB* double mutant exhibited a distinct expression pattern of

genes involved in signaling (Fig 8C). The LIMLP\_07050 ORF that codes for a DGC was down-regulated; two ORFs encoding adenylate/guanylate cyclases (LIMLP\_00130 and LIMLP\_02085) and the PDE-encoding LIMLP\_04775 ORF were up-regulated in the *perRAperRB* mutant. Finally, only 6 ORFs were differentially expressed in all mutants (Fig 7A), including LIMLP\_04255 and LIMLP\_15470 (S4 and S5 Tables). Moreover, a substantial number of regulatory factors (transcriptional regulators, two-component systems, sigma factors) were differentially-expressed exclusively in the *perRAperRB* mutant (S4 and S5 Tables).

In the double *perRAperRB* mutant, several ORFs encoding factors putatively involved in cell growth (cell division, respiration and cell wall homeostasis), chemotaxis and motility are significantly up-regulated, with a Log<sub>2</sub>FC greater than 1.5 (S5 Table). This correlates with a higher ability of the *perRAperRB* mutant to reach a higher cell number when cultivated *in vitro* at 30°C (Fig 6 and S4 Fig).

In addition to the PerRA-repressed peroxidases (catalase, AhpC, CCP), other oxidative-stress related factors exhibited a higher expression in the *perRAperRB* mutant (Fig 8B). DoxX-encoding ORF, which is up-regulated upon concomitant *perRA* and *perRB* inactivation (Log<sub>2</sub>FC 1.65), is an integral membrane protein that interacts with SodA in *M. tuberculosis* and participates in tolerance to oxidative and redox stress [40]. Two imelysins (LIMLP\_14170/LruB and LIMLP\_14180) and a thiol peroxidase (LIMLP\_14175) exhibited also a higher expression in the *perRAperRB* mutant (Log<sub>2</sub>FC of 2.36, 1.93, and 2.04 respectively, Fig 8B). All these up-regulated factors (except DoxX) were also up-regulated upon exposure to deadly H<sub>2</sub>O<sub>2</sub> dose [27] and they probably participate in the higher tolerance of the double mutant in the presence of oxidants. Despite the up-regulation of several factors involved in the defense against ROS, the DNA repair protein RadC (encoded by LIMLP\_11400) and the

glutathione S transferase (encoded by LIMLP\_13670) were notably down-regulated in the *perRAperRB* mutant (Log<sub>2</sub>FC of -1.9 and -2.3, respectively) (Fig 8B and S4 Table).

Strikingly, several down-regulated ORFs in the double *perRAperRB* mutant such as *clpB*, *ligA*, *ligB*, and the operon *lvrAB* have been associated with *Leptospira* virulence. As in many bacteria, leptospiral ClpB ATPase is involved in disaggregating protein aggregates arising upon stress-induced protein denaturation [41]. *ClpB* expression is increased upon exposure to H<sub>2</sub>O<sub>2</sub> and it is required for *Leptospira* virulence [27,42]. The ClpB-encoding ORF (LIMLP\_10060) is dramatically down-regulated in the *perRAperRB* mutant (Log<sub>2</sub>FC of -2.99) (Fig 8D and S4 Table).

Another virulence factors in *Leptospira* are the immunoglobulin-like LigA (LIMLP\_15405) and LigB (LIMLP\_15415) proteins. These surface-exposed proteins are involved in adhesion to host cells through ECM binding [43] and participate in the immune evasion through binding to the host complement Factor H and C4b binding protein [44]. Simultaneous down-regulation of *ligA* and *ligB* expression led to attenuation of *Leptospira* virulence [45]. *LigA* and *ligB* were down-regulated in the *perRAperRB* mutant (Log<sub>2</sub>FC of -3 and -2.44, respectively) (Fig 8D and S5 Table).

*LvrA* (LIMLP\_08490) and *lvrB* (LIMLP\_08485) encode a hybrid histidine kinase and a hybrid response regulator, respectively. Inactivation of the *lvrAB* operon led to virulence attenuation in *L. interrogans* [46]. *LvrA* and *lvrB* had both a decreased expression in the *perRAperRB* mutant (Log<sub>2</sub>FC of -2.3) (Fig 8D and S5 Table).

Additional ORFs encoding chaperones (the small heat shock proteins Hsp15 and Hsp20) or enzymes involved in protein folding (the disulfide isomerase DsbD and the peptidyl-prolyl cis-trans isomerase SlyD) and degradation (HtpX) were down-regulated in the *perRAperRB* mutant. The involvement of these factors in *Leptospira* virulence has not been demonstrated but small Hsps participate in *M. tuberculosis* growth in macrophages [47]. DsbD and these

two small Hsps were up-regulated in *L. interrogans* upon exposure to H<sub>2</sub>O<sub>2</sub> [27]. All these factors might protect *Leptospira* proteostasis under adverse conditions as encountered during infection inside a host. The down-regulation of these virulence-associated genes together with the differential expression of several other genes was confirmed by RT-qPCR (S5 Fig). Interestingly, gene expression of the virulence-associated genes (*lvrA*, *lvrB*, *ligA*, *ligB*, *clpB*, *hsp15*, and *hsp20*) was increased to the WT level (or even to a higher level) in the double *perRAperRB* mutant strain complemented in trans only with *perRB* (Fig 9). Taken together, these findings indicate that the loss of virulence resulting from the concomitant inactivation of *perRA* and *perRB* correlated with a global deregulation of a complex gene network, including genes associated with virulence.

#### **Identification of differentially-expressed non-coding RNAs in the *perRB* and *perRAperRB* mutants.**

Intergenic regions were also analyzed to identify differentially expressed predicted non-coding RNAs (ncRNAs). As observed for coding sequences, inactivation of *perRB* led to the deregulation of only a few putative ncRNAs and most of the changes in expression were below two folds (see S6 Table for a complete set of data). Nonetheless, a few numbers of ncRNAs were significantly down-regulated with a Log<sub>2</sub>FC below -1 (S7 Table). Some of the differentially-expressed ncRNAs (LepncRNA36, LepncRNA87, LepncRNA89, LepncRNA109, LepncRNA139) were located in the proximate vicinity of differentially-expressed ORFs in the *perRB* mutant. Three ncRNAs (LepncRNA35, LepncRNA89 and LepncRNA109) were also differentially expressed upon *perRA* inactivation (S7 Table) [27]. 55 putative ncRNAs were differentially-expressed (with a Log<sub>2</sub>FC cutoff of  $\pm 1$ ) in the *perRAperRB* mutant and several of them were adjacent or overlapped differentially-expressed



ORFs (S8 Table). Only a few of these differentially-expressed ncRNAs had an altered expression in the single *perRA* and *perRB* mutant (S8 Table) [27].

Among the most highly differentially-expressed ncRNAs was LepncRNA38 that was located downstream *ccp*, a highly up-regulated ORF in the *perRAperRB* mutant (Fig 10 and S8 Table). LepncRNA38 and *ccp* were also up-regulated in the *perRA* mutant [27]. The ncRNA LepncRNA49, which was down-regulated in the *perRAperRB* mutant, overlapped with *exbB* (LIMLP\_04255), an ORF that was also down-regulated in the double *perRAperRB* mutant as well as in the single *perRA* and *perRB* mutants (Fig 10). The down-regulated LepncRNA105 and LepncRNA130 ncRNAs were located downstream the *hsp20-15* operon and *gst*, respectively, three ORFs whose expression is decreased in the *perRAperRB* mutant (Fig 10 and S8 Table). It is worth noting that LepncRNA38, LepncRNA105 and LepncRNA130 are up-regulated by H<sub>2</sub>O<sub>2</sub> as were *ccp*, *hsp20-15* and *gst* ([27]; Fig 10).

Altogether, these findings indicate that the absence of both PerRA and perRB triggers major changes in the transcriptional activity of many ncRNAs in *L. interrogans*, that could consequently alter the expression of many ORFs.



## Discussion

Virulence mechanisms are poorly characterized in pathogenic *Leptospira*. These bacteria possess a high number of genes encoding proteins of unknown function (40% of the genomes) and many of them are pathogen-specific. Pathogenic *Leptospira* spp. lack many classical virulence factors, such as a type III to type VI secretion systems, and it is unclear which factors are important for its pathogenesis. It is therefore generally agreed that these pathogens possess unique virulence factors. Nonetheless, studying heme oxygenase and catalase mutants have shown that, *in vivo*, iron acquisition and defense against peroxide stress are important virulence-associated mechanisms in *L. interrogans* [11,48]. Catalase is repressed by PerRA [24,27] and genes encoding factors involved in iron uptake are very likely controlled by regulators of the Fur-family.

In addition to PerRA, pathogenic *Leptospira* contain three other ORFs annotated as Furs. In the present study, we have characterized the *L. interrogans* Fur-like regulator encoded by LIMLP\_05620 and showed that it exhibits characteristic features of a PerR regulator. We consequently named this ORF *perRB*. Sequence alignment and phylogenetic analyses revealed that PerRB is the closest relative to the already characterized PerRA, and perhaps more importantly, they both do exhibit the canonical amino acid residues that are the hallmark of a PerR. The H<sub>2</sub>O<sub>2</sub> sensing histidine and aspartate residues are conserved in *Leptospira* PerRA and PerRB and, interestingly, both genes are H<sub>2</sub>O<sub>2</sub>-responsive, albeit with different apparent sensitivity. This is consistent with a mechanism whereby PerRA and PerRB would repress their own transcription and dissociate from their promoter upon oxidation by H<sub>2</sub>O<sub>2</sub>, leading to alleviation of repression. Moreover, the higher survival of the *perRB* mutant in the presence of superoxide suggests a derepression of genes encoding defenses against ROS and therefore the participation of PerRB in controlling the adaptation to oxidative stress. Neither

*perRA* nor *perRB* expression was up-regulated in iron-limiting condition [24]. Although the putative lipoprotein LIMLP\_18755 was significantly up-regulated in the *perRB* mutant and under iron-limiting condition, there was no strong overlap between PerRB regulon and the transcriptional response to iron-limiting condition [24]. Altogether, these findings could argue in favor of LIMLP\_05620 encoding a PerR-like regulator rather than a Fur. However, because iron homeostasis and oxidative stress are intertwined, a certain functional relationship has been observed between PerR and Fur. In several bacteria where PerR and Fur coexist, including *B. subtilis* and *C. jejuni*, the PerR regulon overlaps with that of Fur [49,50]. In addition, *fur* and several Fur-regulated genes are also differentially expressed in the presence of H<sub>2</sub>O<sub>2</sub> [51,52]. In fact, PerR represses *fur*, whose expression is up-regulated in the presence of H<sub>2</sub>O<sub>2</sub> as a consequence of dissociation of PerR from the *fur* promotor [53,54]. Metal-catalyzed oxidation of the H<sub>2</sub>O<sub>2</sub> sensing residues will be fundamental in establishing that the Per-like regulator encoded by LIMLP\_05620 is a *bona fide* PerR.

To the best of our knowledge, this is the first report that has identified the coexistence of two PerR regulators in a pathogenic Gram-negative bacterium. The coexistence of three PerR-like regulators has been reported only in Gram-positive bacteria such as *B. licheniformis* and *M. smegmatis*. It was shown that the three *B. licheniformis* PerRs sense hydrogen peroxide by histidine oxidation, although with different sensitivity [55]. In *M. smegmatis*, three Fur-like paralogs displayed the canonical PerR Asp residue involved in H<sub>2</sub>O<sub>2</sub> sensitivity, exhibited H<sub>2</sub>O<sub>2</sub> sensing by metal-catalyzed histidine oxidation and a higher H<sub>2</sub>O<sub>2</sub> resistance when their genes were inactivated [56].

One important question was to understand the mechanism that have led to the coexistence of PerRA and PerRB exclusively in highly virulent species (P1 clade). Virulent mammalian-adapted strains in the *Leptospira* genus might have originated from a free-living ancestor inhabiting soils. The phylogenetic analysis presented here indicates that the coexistence of

PerRA and PerRB is not due to gene duplication. Indeed, PerRA was already present in the leptospirales ancestor whereas PerRB was probably acquired by pathogenic species by horizontal transfer from a soil/aquatic bacterium of another phylum. In this scenario, PerRA would have been lost by the P2 clade intermediate species but maintained together with PerRB by the P1 clade species to establish full virulence.

We had previously shown that when *perRA* was inactivated, *L. interrogans* acquired a higher resistance to H<sub>2</sub>O<sub>2</sub> explained by the derepression of *katE*, *ahpC* and *ccp* [24,27]. Here, we have demonstrated that inactivating *perRB* resulted in a higher survival of *L. interrogans* in the presence of the superoxide but it did not affect the survival of *L. interrogans* in the presence of H<sub>2</sub>O<sub>2</sub>. Therefore, even though *perRB* is up-regulated upon exposure to H<sub>2</sub>O<sub>2</sub> as *perRA*, the consequence of *perRB* inactivation is different than that of *perRA*, suggesting that PerRA and PerRB have a distinct and non-redundant function in *Leptospira* adaptation to oxidative stress. The distinct repartition of PerRA and PerRB in the *Leptospira* genus and differences in their respective regulon support the hypothesis of a non-redundant function in the adaptation to oxidative stress. The PerRA and PerRB regulons determined when *L. interrogans* are cultivated inside a host using DMC implemented in rats confirmed the limited overlap between PerRA and PerRB regulons [57].

Phenotypic studies suggest that PerRB represses (directly or indirectly) genes encoding defenses against superoxide. Highly pathogenic *Leptospira* species (from the P1 clade) do not encode any SOD or SOR that could be responsible for detoxification of superoxide whereas intermediate species (P2 clade) and saprophyte non-pathogenic *Leptospira* do have such enzymes. Understanding how pathogenic *Leptospira* detoxify superoxide encountered during infection is a very important question. Overall, the differentially-expressed genes upon *perRB* inactivation are mostly *Leptospira*-specific and poorly characterized. Examining the PerRB regulon determined when *Leptospira* are cultivated in laboratory conditions did not allow to

draw a conclusive hypothesis on the identity of the factors that could participate in superoxide detoxification in *L. interrogans*. The highest differentially-expressed ORFs were mainly involved in regulation and cell signaling (transcription and sigma factors, adenylate/diguanylate cyclase, TCSs) and could be involved in regulating the adaptation to various challenging stress encountered in the environment or within a host. Further studies will be required to determine whether superoxide detoxification in *L. interrogans* is mediated by enzymatic detoxification or metal-dependent scavenging mechanisms and to clarify the exact role of PerRB in controlling those pathways.

The low number of significantly differentially-expressed genes in the *perRB* mutant when *L. interrogans* are cultivated *in vitro* led us to propose that PerRB exerts its function during oxidative stress or upon host-related conditions. Consistent with this hypothesis is the up-regulation of *perRB* in the presence of lethal H<sub>2</sub>O<sub>2</sub> dose. It is worth noting that there is, to some extent, an overlap between the PerRB regulon and the differentially-expressed genes upon exposure to lethal H<sub>2</sub>O<sub>2</sub> dose [27]. Moreover, the exclusive presence of PerRB in the pathogenic *Leptospira* clades strongly suggests that PerRB function is more related to regulating adaptation to infection-related conditions rather than to environmental survival. Very interestingly, when the *perRB* mutant was cultivated in the host conditions using the DMC implants, a higher number of genes were differentially-expressed with greater fold changes than when the *perRB* mutant was cultivated at 30°C in the laboratory conditions [57]. Notably, in the host condition, the absence of *perRB* also led to the deregulation of several genes involved in signaling and regulation, which is consistent with a role of PerRB in regulating adaptation to the host environment [57].

One feature of *Leptospira* genus is the genetic and functional redundancy where multiple genes commonly encode for a similar function. The development of genetic tools has made random and targeted mutagenesis possible, albeit with a low efficiency. Due to this limitation,

only a few *Leptospira* virulence factors have been identified and have fulfilled Koch's molecular postulates. The present study is the first to report the concomitant inactivation of two genes and complementation of a double mutant in a pathogenic *Leptospira*. Obtaining a double *perRAperRB* mutant gave us the unique opportunity to investigate the functional relationship between two PerR-like regulators in a pathogenic bacterium.

In many pathogens which contain only one PerR paralog, such as *N. gonorrhoeae*, *S. pyogenes*, and *S. aureus*, PerR was shown to be involved in virulence [54,58–61]. The single *L. interrogans perRA* and *perRB* mutants still retain full virulence in the model for acute leptospirosis (this study and [24]). Interestingly, virulence attenuation was only observed upon the concomitant inactivation of *perRA* and *perRB*, suggesting an interplay in controlling (directly or indirectly) *L. interrogans* virulence-associated genes. The loss of virulence correlated with a large differential gene and ncRNA expression compared not only with the WT but also with the single mutant strains. In other words, the double *perRAperRB* displayed differential gene expression that were not observed in the single *perRA* and *perRB* mutants. This could indicate that a subset of genes and ncRNAs is controlled by both PerRA and PerRB. The absence of one regulator could be compensated by the other and most of the genes and ncRNAs that can be regulated by the two regulators would not be differentially expressed in the single mutants. The few genes (LIMLP\_02010, LIMLP\_04255, LIMLP\_04235, LIMLP\_11810, LIMLP\_14225, LILP\_15470, and LIMLP\_18235) and ncRNAs that display differential expression in the single mutants in our transcriptomic studies (this study and [27]) indicate a certain functional redundancy of the two regulators even if the phenotypic analyses of the mutants suggest distinct functions. The change in expression of a few regulators when PerRA and PerRB are both absent could lead to major changes in expression of many ORFs or ncRNAs in cascade. One can also speculate that among the large differentially-expressed genes only observed in the double *perRAperRB*

mutant some deregulation might be due to a compensatory effect to maintain a productive fitness.

Despite a higher ability to resist ROS, the double *perRAperRB* mutant has lost its virulence; it could not trigger acute leptospirosis-associated morbidity. This could be obviously explained by a significant lower expression of several virulence-associated factors in the double *perRAperRB* mutant, such as LigA, LigB, LvrA, LvrB, and ClpB. In addition, other dramatically down-regulated genes encode factors such as small Hsps (Hsp15 and Hsp20) for which a role in bacterial virulence is demonstrated in other bacteria including *M. tuberculosis* [62]. Moreover, several differentially-expressed ORFs of unknown function could also be responsible for the loss of virulence of the double *perRAperRB* mutant. It is noteworthy that the double *perRAperRB* mutant was also unable to colonize mice [57] and, consistent with what is observed with *in vitro*-cultivated *perRAperRB* mutant, this correlated with dramatic gene dysregulation including down-regulation of *ligA* and *ligB* [57].

In summary, this study has allowed to identify a second PerR-like regulator in pathogenic *L. interrogans* strains that cooperates with PerRA to control the adaptation to oxidative stress and virulence. By concomitantly inactivating *perRA* and *perRB* and establishing the molecular Koch' postulates, we have unveiled a complex regulatory network that reveals, for the first time, a functional relationship between PerR regulators and *Leptospira* virulence, most likely through the regulation of virulence- and pathogenicity-associated factors.

## Materials and Methods

### Bacterial strains and growth condition

*L. interrogans* serovar Manilae strain L495, *perRA* (M776), *perRB* (M1474), and the double *perRAperRB* mutant strains (see S9 Table for a complete description of the strains used in this study) were grown aerobically at 30°C in Ellinghausen-McCullough-Johnson-Harris medium (EMJH) [63] with shaking at 100 rpm. *Leptospira* growth was followed by measuring the absorbance at 420 nm.  $\beta$ 2163 and  $\Pi$ 1 *E. coli* strains were cultivated at 37°C in Luria-Bertani medium with shaking at 37°C in the presence of 0.3 mM thymidine or diaminopimelic acid (Sigma-Aldrich), respectively. When needed, spectinomycin, kanamycin and gentamycin were added at the respective concentration of 50  $\mu$ g/ml, 30  $\mu$ g/ml, and 8  $\mu$ g/ml.

### Concomitant inactivation of *perRA* (LIMLP\_10155) and *perRB* (LIMLP\_05620).

*PerRA* gene (LIMLP\_10155/LIC12034/LA1857) was inactivated in the *perRB* (LIMLP\_05620/LIC11158/LA2887) mutant strain (M1474, *perRB::Km<sup>R</sup>*) by introduction of a spectinomycin resistance cassette (S4 Fig). For this, a spectinomycin resistance cassette flanked by 0.8 kb sequences homologous to the sequences flanking *perRA* was created by gene synthesis (GeneArt, Life Technologies) and cloned into a kanamycin-resistant *Escherichia coli* vector unable to replicate in *Leptospira*. The obtained suicide plasmid (pK $\Delta$ perRA) (S10 Table) was introduced in the *perRB* mutant strain by electroporation as previously described [64] using a Gene Pulser Xcell (Biorad). Individual spectinomycin-resistant colonies were selected on EMJH plates containing 50  $\mu$ g/ml spectinomycin and screened by PCR (using the P1 and P2 primer set, see S11 Table) for proper replacement of the *perRA* coding sequence by the spectinomycin resistance cassette. *PerRA* inactivation in the double *perRAperRB* mutant was verified by western blot using an anti-PerRA serum (S4 Fig).



## Complementation of the single *perRB* and double *perRAperRB* mutants

The *perRB* mutant (*perRB::Km<sup>R</sup>*) complementation was performed by expressing the *perRB* ORF in the pMaORI replicative vector [65]. The *perRB* (LIMLP\_05620) ORF together with its native promoter region (200 bp upstream region) were amplified from genomic DNA of *L. interrogans* serovar Manilae strain L495 (using the ComPerR2\_5Not and ComPerR2\_3Xba primer set, S11 Table) and cloned between the NotI and XbaI restriction sites in the pMaORI vector. The absence of mutation in the *perRB* ORF in the obtained plasmid (pNB139) was checked by DNA sequencing and the pNB139 plasmid was introduced in the *perRB* mutant (M1474) by conjugation using the *E. coli*  $\beta$ 2163 conjugating strain as previously described [66]. *Leptospira* conjugants were selected on EMJH plates containing 50  $\mu$ g/ml spectinomycin and resistant colonies were then inoculated into liquid EMJH medium supplemented with spectinomycin for further analysis. The restoration of *PerRB* expression in the complemented *perRB* mutant was verified by RT-qPCR.

The double *perRAperRB* mutant ( $\Delta$ *perRA*, *perRB::Km<sup>R</sup>*) complementation required the construction of a gentamycin resistant pMaORI complementation vector. A gentamycin resistant cassette [67] was cloned into the pMaORI between the NotI and XbaI restriction sites and the integrity of the gentamycin resistance cassette in the pMaORIGenta plasmid (S10 Table) was checked by DNA sequencing. Then, the *perRB* ORF (LIMLP\_05620) together with its native promoter region (248 bp upstream region) were amplified (using the F-ApaI-PerR2genta and R-ApaI-PerR2genta primer set, S11 Table) from genomic DNA of *L. interrogans* serovar Manilae strain L495 and cloned into the PCR-blunt II TOPO vector (Zero Blunt TOPO PCR cloning kit, Invitrogen). The *perRB* locus was subsequently subcloned into the pMaORIGenta plasmid at the ApaI restriction site. The obtained plasmid (pCZ3, S10 Table) or the empty pMaORIGenta plasmids were introduced in *perRAperRB* double



*Leptospira* mutant strain by conjugation using the *E. coli*  $\beta$ 2163 conjugating strain as previously described [66]. *Leptospira* conjugants were selected on EMJH plates containing 8  $\mu$ g/ml gentamycin and resistant colonies were then inoculated into liquid EMJH medium supplemented with gentamycin and spectinomycin for further analysis. The restoration of *PerRB* expression in the trans-complemented double *perRAperRB* mutant was verified by RT-qPCR (S4 Fig).

## Phylogenetic analyses

The sequences homologous to the LIMLP\_10155 (*PerRA*), LIMLP\_05620 (*PerRB*), LIMLP\_18590 and LIMLP\_04825 proteins were searched with BLASTP version 2.10.0 among the other *Leptospira* species (Fig 3 and S1 Table) or among the protein sequences of 11,070 representative genomes (Fig 2), as previously described [68]. In that case, only the sequences with an e-value less than 1e-10 and a percentage of similarity greater than 60% were retained. Sequences with percent identity equal to 100% were clustered by CD-HIT version 4.8.1 and only one sequence was retained. The resulting 1671 sequences were subsequently aligned by MAFFT version 7.471. A phylogenetic tree was finally built with IQ-TREE version 2.1.1 under the best-fit model LG + R10. A second phylogenetic tree was made with a subset of sequences to improve the resolution of the separation between *PerRA* and *PerRB*. The same procedure was followed, except that the best-fit model used for phylogenetic reconstruction is LG + R5. Both trees were visualized with FigTree version 1.4.4 (<https://github.com/rambaut/figtree>).

## RNA purification

Virulent *L. interrogans* serovar Manilae strain L495 and *perRB* (M1474) mutant strains with less than three *in vitro* passages were used in this study. Four independent biological

replicates of exponentially grown *L. interrogans* WT, *perRB* (M1474) and double *perRAperRB* mutant strains were harvested and resuspended in 1 ml TRIzol (ThermoFisher Scientific) and stored at -80°C. Nucleic Acids were extracted with chloroform and precipitated with isopropanol as described earlier [69]. Contaminating genomic DNA was removed by DNase treatment using the RNase-free Turbo DNA-free turbo kit (ThermoFisher Scientific) as described by the manufacturer. The integrity of RNAs (RIN > 8.0) was verified by the Agilent Bioanalyzer RNA NanoChips (Agilent technologies, Wilmington, DE).

### RNA Sequencing

rRNA were depleted from 0.5 µg of total RNA using the Ribo-Zero rRNA Removal Kit (Bacteria) from Illumina. Sequencing libraries were constructed using the TruSeq Stranded mRNA Sample preparation kit (20020595) following the manufacturer's instructions (Illumina). The directional libraries were controlled on Bioanalyzer DNA1000 Chips (Agilent Technologies) and concentrations measured with the Qubit dsDNA HS Assay Kit (ThermoFisher). Sequences of 65 bases were generated on the Illumina Hiseq 2500 sequencer.

Bioinformatics analyses were performed using the RNA-seq pipeline from Sequana [70]. Reads were cleaned of adapter sequences and low-quality sequences using cutadapt version 1.11 [71]. Only sequences at least 25 nt in length were considered for further analysis. Bowtie version 1.2.2 [72], with default parameters, was used for alignment on the reference genome (*L. interrogans* serovar Manilae strain UP-MMC-NIID LP, from MicroScope Platform). Genes were counted using featureCounts version 1.4.6-p3 [73] from Subreads package (parameters: -t gene -g locus\_tag -s 1).

Count data were analyzed using R version 3.5.1 [74] and the Bioconductor package DESeq2 version 1.20.0 [75]. The normalization and dispersion estimation were performed with DESeq2 using the default parameters and statistical tests for differential expression were performed applying the independent filtering algorithm. Differential expressions were expressed as logarithm to base 2 of fold change ( $\text{Log}_2\text{FC}$ ). A generalized linear model including the replicate effect as blocking factor was set in order to test for the differential expression between *Leptospira* samples. Raw p-values were adjusted for multiple testing according to the Benjamini and Hochberg (BH) procedure [76] and genes with an adjusted p-value lower than 0.05 and a  $\text{Log}_2\text{FC}$  higher than 1 or lower than -1 were considered differentially expressed. Heat maps and Volcano plots were generated using the Galaxy platform (<https://usegalaxy.eu/>).

## **Quantitative RT-PCR experiments**

cDNA synthesis was performed with the cDNA synthesis kit (Biorad) according to the manufacturer's recommendation. Quantitative PCR was conducted in triplicate with the SsoFast EvaGreen Supermix (Biorad) as previously described. LIMLP\_06735 was used as a reference gene.

## **Non-coding RNA identification**

Sequencing data from the *L. interrogans* WT, *perRB* (M1474) and double *perRAperRB* mutant strains were processed with Trimmomatic [77] to remove low-quality bases and adapter contaminations. BWA mem (version 0.7.12) was used to discard the reads matching *Leptospira* rRNA, tRNA or polyA sequences and to assign the resulting reads to *Leptospira* replicons. Then Rockhopper [78] was used to re-align reads corresponding to separate replicons and to assemble transcripts models. The output was filtered to retain all transcripts

longer than 50 nucleotides not overlapping within 10 nucleotides with NCBI annotated genes on the same orientation, and showing a minimum Rockhopper raw count value of 50 in at least two isolates. This high-quality set of new sRNA was subjected to differential expression analysis with Rockhopper, adopting a Benjamini-Hochberg adjusted P-value threshold of 0.01. For each non-coding RNAs, putative function was identified by BLAST using the Rfam database [79].

## **Infection experiments**

WT and mutant *L. interrogans* strains were cultivated in EMJH medium until the exponential phase and counted under a dark-field microscope using a Petroff-Hauser cell.  $10^4$  or  $10^6$  bacteria (in 0.5 ml) were injected intraperitoneally in groups of 4-8 male 4 weeks-old Syrian Golden hamsters (RjHan:AURA, Janvier Labs). Animals were monitored daily and sacrificed by carbon dioxide inhalation when endpoint criteria were met (sign of distress, morbidity).

## **Ethics Statement**

The protocol for animal experimentation was reviewed by the Institut Pasteur (Paris, France), the competent authority, for compliance with the French and European regulations on Animal Welfare and with Public Health Service recommendations. This project has been reviewed and approved (CETEA #2016-0019) by the Institut Pasteur ethic committee for animal experimentation, agreed by the French Ministry of Agriculture.

## **Acknowledgement**

The authors would like to thank Melissa Caimano and André Grassmann for fruitful discussions.

## Funding

Crispin Zavala-Alvarado was part of the Pasteur - Paris University (PPU) International PhD Program. This project has received funding from the European Union's Horizon 2020 research and innovation programme (<https://ec.europa.eu/programmes/horizon2020/en>) under the Marie Skłodowska-Curie grant agreement No 665807 (<https://ec.europa.eu/research/mariecurieactions>) and from Fondation Etchebès-Fondation France (S-CM 16008) (<https://www.fondationdefrance.org/fr/fondation/fondation-etchebes>). The funders had no role in study design, data collection and analysis, decision to publish, or preparation of the manuscript.

## References

1. Haake DA, Levett PN. Leptospirosis in humans. *Curr Top Microbiol Immunol*. 2015;387:65-97.
2. Costa F, Hagan JE, Calcagno J, Kane M, Torgerson P, Martinez-Silveira MS, et al. Global Morbidity and Mortality of Leptospirosis: A Systematic Review. *PLoS Negl Trop Dis*. 2015;9(9):e0003898-e0003898.
3. Pijnacker R, Goris MGA, te Wierik MJM, Broens EM, van der Giessen JWB, de Rosa M, et al. Marked increase in leptospirosis infections in humans and dogs in the Netherlands, 2014. *Eurosurveillance* [Internet]. 2016;21(17).  
<https://www.eurosurveillance.org/content/10.2807/1560-7917.ES.2016.21.17.30211>
4. Ko AI, Goarant C, Picardeau M. *Leptospira*: the dawn of the molecular genetics era for an emerging zoonotic pathogen. *Nat Rev Microbiol*. 2009;7(10):736-47.
5. Picardeau M. Virulence of the zoonotic agent of leptospirosis: still terra incognita? *Nat Rev Microbiol*. 2017;15(5):297-307.
6. Imlay JA. Where in the world do bacteria experience oxidative stress? *Environmental Microbiology*. 2019;21(2):521-30.
7. Winterbourn CC, Kettle AJ. Redox Reactions and Microbial Killing in the Neutrophil Phagosome. *Antioxidants & Redox Signaling*. 2012;18(6):642-60.
8. Marangoni A, Accardo S, Aldini R, Guardigli M, Cavrini F, Sambri V, et al. Production of reactive oxygen species and expression of inducible nitric oxide synthase in rat isolated Kupffer cells stimulated by *Leptospira interrogans* and *Borrelia burgdorferi*. *World J Gastroenterol*. 2006;12(19):3077-81.
9. Araújo AM, Reis EAG, Athanazio DA, Ribeiro GS, Hagan JE, Araujo GC, et al. Oxidative stress markers correlate with renal dysfunction and thrombocytopenia in severe leptospirosis. *Am J Trop Med Hyg*. 2014;90(4):719-23.
10. Erdogan HM, Karapehlivan M, Cital M, Atakisi O, Uzlu E, Unver A. Serum sialic acid and oxidative stress parameters changes in cattle with leptospirosis. *Veterinary Research Communications*. 2008;32(4):333-9.
11. Eshghi A, Lourdault K, Murray GL, Bartpho T, Sermswan RW, Picardeau M, et al. *Leptospira interrogans* Catalase Is Required for Resistance to H<sub>2</sub>O<sub>2</sub> and for Virulence. Blanke SR, éditeur. *Infect Immun*. 2012;80(11):3892.
12. Dubbs JM, Mongkolsuk S. Peroxide-sensing transcriptional regulators in bacteria. *J Bacteriol*. 2012;194(20):5495-503.
13. Choi H-J, Kim S-J, Mukhopadhyay P, Cho S, Woo J-R, Storz G, et al. Structural Basis of the Redox Switch in the OxyR Transcription Factor. *Cell*. 2001;105(1):103-13.
14. Zheng M, Åslund F, Storz G. Activation of the OxyR Transcription Factor by Reversible Disulfide Bond Formation. *Science*. 1998;279(5357):1718.
15. Herbig AF, Helmann JD. Roles of metal ions and hydrogen peroxide in modulating the interaction of the *Bacillus subtilis* PerR peroxide regulon repressor with operator DNA. *Mol Microbiol*. 2001;41(4):849-59.
16. Jacquamet L, Traoré D a. K, Ferrer J-L, Proux O, Testemale D, Hazemann J-L, et al. Structural characterization of the active form of PerR: insights into the metal-induced

- 855 activation of PerR and Fur proteins for DNA binding. *Mol Microbiol.* 2009;73(1):20-31.
- 856 17. Traoré DAK, El Ghazouani A, Ilango S, Dupuy J, Jacquamet L, Ferrer J-L, et al.  
857 Crystal structure of the apo-PerR-Zn protein from *Bacillus subtilis*. *Mol Microbiol.*  
858 2006;61(5):1211-9.
- 859 18. Lee J-W, Helmann JD. The PerR transcription factor senses H<sub>2</sub>O<sub>2</sub> by metal-catalysed  
860 histidine oxidation. *Nature.* 2006;440(7082):363-7.
- 861 19. Traoré DAK, El Ghazouani A, Jacquamet L, Borel F, Ferrer J-L, Lascoux D, et al.  
862 Structural and functional characterization of 2-oxo-histidine in oxidized PerR protein. *Nat*  
863 *Chem Biol.* 2009;5(1):53-9.
- 864 20. Nunoshiba T, Hidalgo E, Amábile Cuevas CF, Demple B. Two-stage control of an  
865 oxidative stress regulon: the *Escherichia coli* SoxR protein triggers redox-inducible  
866 expression of the soxS regulatory gene. *J Bacteriol.* 1992;174(19):6054-60.
- 867 21. Wu J, Weiss B. Two-stage induction of the soxRS (superoxide response) regulon of  
868 *Escherichia coli*. *J Bacteriol.* 1992;174(12):3915-20.
- 869 22. Gu M, Imlay JA. The SoxRS response of *Escherichia coli* is directly activated by  
870 redox-cycling drugs rather than by superoxide. *Mol Microbiol.* 2011;79(5):1136-50.
- 871 23. Price CW, Fawcett P, Cérémonie H, Su N, Murphy CK, Youngman P. Genome-wide  
872 analysis of the general stress response in *Bacillus subtilis*. *Mol Microbiol.* 2001;41(4):757-74.
- 873 24. Lo M, Murray GL, Khoo CA, Haake DA, Zuerner RL, Adler B. Transcriptional  
874 response of *Leptospira interrogans* to iron limitation and characterization of a PerR homolog.  
875 *Infect Immun.* 2010;78(11):4850-9.
- 876 25. Austin FE, Barbieri JT, Corin RE, Grigas KE, Cox CD. Distribution of superoxide  
877 dismutase, catalase, and peroxidase activities among *Treponema pallidum* and other  
878 spirochetes. *Infect Immun.* 1981;33(2):372-9.
- 879 26. Fouts DE, Matthias MA, Adhikarla H, Adler B, Amorim-Santos L, Berg DE, et al.  
880 What Makes a Bacterial Species Pathogenic?: Comparative Genomic Analysis of the Genus  
881 *Leptospira*. *PLOS Neglected Tropical Diseases.* 2016;10(2):e0004403.
- 882 27. Zavala-Alvarado C, Sismeiro O, Legendre R, Varet H, Bussotti G, Bayram J, et al.  
883 The transcriptional response of pathogenic *Leptospira* to peroxide reveals new defenses  
884 against infection-related oxidative stress. *PLOS Pathogens.* 2020;16(10):e1008904.
- 885 28. Caux-Thang C, Parent A, Sethu R, Maïga A, Blondin G, Latour J-M, et al. Single  
886 asparagine to arginine mutation allows PerR to switch from PerR box to fur box. *ACS Chem*  
887 *Biol.* 2015;10(3):682-6.
- 888 29. Parent A, Caux-Thang C, Signor L, Clémancey M, Sethu R, Blondin G, et al. Single  
889 glutamate to aspartate mutation makes ferric uptake regulator (Fur) as sensitive to H<sub>2</sub>O<sub>2</sub> as  
890 peroxide resistance regulator (PerR). *Angew Chem Int Ed Engl.* 2013;52(39):10339-43.
- 891 30. Kebouchi M, Saul F, Taher R, Landier A, Beaudeau B, Dubrac S, et al. Structure and  
892 function of the *Leptospira interrogans* peroxide stress regulator (PerR), an atypical PerR  
893 devoid of a structural metal-binding site. *J Biol Chem.* 2018;293(2):497-509.
- 894 31. Satou K, Shimoji M, Tamotsu H, Juan A, Ashimine N, Shinzato M, et al. Complete  
895 Genome Sequences of Low-Passage Virulent and High-Passage Avirulent Variants of  
896 Pathogenic *Leptospira interrogans* Serovar Manilae Strain UP-MMC-NIID, Originally  
897 Isolated from a Patient with Severe Leptospirosis, Determined Using PacBio Single-Molecule



- 898 Real-Time Technology. *Genome Announc.* 2015;3(4):e00882-15.
- 899 32. Domingos RF, Vieira ML, Romero EC, Gonçalves AP, de Moraes ZM, Vasconcellos  
900 SA, et al. "Features of two proteins of *Leptospira interrogans* with potential role in host-  
901 pathogen interactions". *BMC Microbiology*. 2012;12(1):50.
- 902 33. Thibeaux R, Soupé-Gilbert M-E, Kainiu M, Girault D, Bierque E, Fernandes J, et al.  
903 The zoonotic pathogen *Leptospira interrogans* mitigates environmental stress through cyclic-  
904 di-GMP-controlled biofilm production. *npj Biofilms and Microbiomes*. 2020;6(1):24.
- 905 34. Xiao G, Kong L, Che R, Yi Y, Zhang Q, Yan J, et al. Identification and  
906 Characterization of c-di-GMP Metabolic Enzymes of *Leptospira interrogans* and c-di-GMP  
907 Fluctuations After Thermal Shift and Infection. *Frontiers in Microbiology*. 2018;9:764.
- 908 35. Narayanavari SA, Lourdault K, Sritharan M, Haake DA, Matsunaga J. Role of sph2  
909 Gene Regulation in Hemolytic and Sphingomyelinase Activities Produced by *Leptospira*  
910 *interrogans*. *PLOS Neglected Tropical Diseases*. 2015;9(8):e0003952.
- 911 36. Caimano MJ, Sivasankaran SK, Allard A, Hurley D, Hokamp K, Grassmann AA, et  
912 al. A Model System for Studying the Transcriptomic and Physiological Changes Associated  
913 with Mammalian Host-Adaptation by *Leptospira interrogans* Serovar Copenhageni. *PLOS*  
914 *Pathogens*. 2014;10(3):e1004004.
- 915 37. Bourhy P, Salaün L, Lajus A, Médigue C, Boursaux-Eude C, Picardeau M. A  
916 Genomic Island of the Pathogen *Leptospira interrogans* Serovar Lai Can Excise from Its  
917 Chromosome. *Infect Immun*. 2007;75(2):677.
- 918 38. He P, Sheng Y-Y, Shi Y-Z, Jiang X-G, Qin J-H, Zhang Z-M, et al. Genetic diversity  
919 among major endemic strains of *Leptospira interrogans* in China. *BMC Genomics*.  
920 2007;8:204-204.
- 921 39. Overton TW, Justino MC, Li Y, Baptista JM, Melo AMP, Cole JA, et al. Widespread  
922 Distribution in Pathogenic Bacteria of Di-Iron Proteins That Repair Oxidative and Nitrosative  
923 Damage to Iron-Sulfur Centers. *J Bacteriol*. 2008;190(6):2004.
- 924 40. Nambi S, Long JE, Mishra BB, Baker R, Murphy KC, Olive AJ, et al. The Oxidative  
925 Stress Network of *Mycobacterium tuberculosis* Reveals Coordination between Radical  
926 Detoxification Systems. *Cell Host & Microbe*. 2015;17(6):829-37.
- 927 41. Krajewska J, Modrak-Wójcik A, Arent ZJ, Więckowski D, Zolkiewski M, Bzowska  
928 A, et al. Characterization of the molecular chaperone ClpB from the pathogenic spirochaete  
929 *Leptospira interrogans*. *PLOS ONE*. 2017;12(7):e0181118.
- 930 42. Lourdault K, Cerqueira GM, Wunder EA, Picardeau M. Inactivation of clpB in the  
931 pathogen *Leptospira interrogans* reduces virulence and resistance to stress conditions. *Infect*  
932 *Immun*. 2011;79(9):3711-7.
- 933 43. Choy HA, Kelley MM, Chen TL, Møller AK, Matsunaga J, Haake DA. Physiological  
934 osmotic induction of *Leptospira interrogans* adhesion: LigA and LigB bind extracellular  
935 matrix proteins and fibrinogen. *Infect Immun*. 2007;75(5):2441-50.
- 936 44. Castiblanco-Valencia MM, Fraga TR, Silva LB da, Monaris D, Abreu PAE, Strobel S,  
937 et al. Leptospiral Immunoglobulin-like Proteins Interact With Human Complement  
938 Regulators Factor H, FHL-1, FHR-1, and C4BP. *The Journal of Infectious Diseases*.  
939 2012;205(6):995-1004.
- 940 45. Pappas CJ, Picardeau M. Control of Gene Expression in *Leptospira* spp. by  
941 Transcription Activator-Like Effectors Demonstrates a Potential Role for LigA and LigB in



- 942 *Leptospira interrogans* Virulence. *Appl Environ Microbiol.* 2015;81(22):7888-92.
- 943 46. Adhikarla H, Wunder EA Jr, Mechaly AE, Mehta S, Wang Z, Santos L, et al. Lvr, a  
944 Signaling System That Controls Global Gene Regulation and Virulence in Pathogenic  
945 *Leptospira*. *Front Cell Infect Microbiol.* 2018;8:45-45.
- 946 47. Yuan Y, Crane DD, Simpson RM, Zhu Y, Hickey MJ, Sherman DR, et al. The 16-kDa  
947  $\alpha$ -crystallin (Acr) protein of *Mycobacterium tuberculosis* is required for growth  
948 in macrophages. *Proc Natl Acad Sci USA.* 1998;95(16):9578.
- 949 48. Murray GL, Srikrum A, Henry R, Puapairoj A, Sermswan RW, Adler B. *Leptospira*  
950 *interrogans* requires heme oxygenase for disease pathogenesis. *Microbes and Infection.*  
951 2009;11(2):311-4.
- 952 49. Hayashi K, Ohsawa T, Kobayashi K, Ogasawara N, Ogura M. The H<sub>2</sub>O<sub>2</sub> Stress-  
953 Responsive Regulator PerR Positively Regulates *srfA* Expression in *Bacillus subtilis*. *Journal*  
954 *of Bacteriology.* 2005;187(19):6659–6667.
- 955 50. Palyada K, Sun Y-Q, Flint A, Butcher J, Naikare H, Stintzi A. Characterization of the  
956 oxidative stress stimulon and PerR regulon of *Campylobacter jejuni*. *BMC Genomics.*  
957 2009;10(1):481.
- 958 51. Mostertz J, Scharf C, Hecker M, Homuth G. Transcriptome and proteome analysis of  
959 *Bacillus subtilis* gene expression in response to superoxide and peroxide stress. Vol. 150,  
960 *Microbiology.* 2004. p. 497-512.
- 961 52. Zhou A, He Z, Redding-Johanson AM, Mukhopadhyay A, Hemme CL, Joachimiak  
962 MP, et al. Hydrogen peroxide-induced oxidative stress responses in *Desulfovibrio vulgaris*  
963 *Hildenborough*. *Environmental Microbiology.* 2010;12(10):2645-57.
- 964 53. Fuangthong M, Herbig AF, Bsat N, Helmann JD. Regulation of the *Bacillus subtilis*  
965 *fur* and *perR* Genes by PerR: Not All Members of the PerR Regulon Are Peroxide Inducible.  
966 *Journal of Bacteriology.* 2002;184(12):3276–3286.
- 967 54. Horsburgh MJ, Ingham E, Foster SJ. In *Staphylococcus aureus*, Fur Is an Interactive  
968 Regulator with PerR, Contributes to Virulence, and Is Necessary for Oxidative Stress  
969 Resistance through Positive Regulation of Catalase and Iron Homeostasis. *Journal of*  
970 *Bacteriology.* 2001;183(2):468–475.
- 971 55. Kim J-H, Ji C-J, Ju S-Y, Yang Y-M, Ryu S-H, Kwon Y, et al. *Bacillus licheniformis*  
972 Contains Two More PerR-Like Proteins in Addition to PerR, Fur, and Zur Orthologues.  
973 *PLOS ONE.* 2016;11(5):e0155539.
- 974 56. Lee H-N, Ji C-J, Lee H-H, Park J, Seo Y-S, Lee J-W, et al. Roles of three FurA  
975 paralogs in the regulation of genes pertaining to peroxide defense in *Mycobacterium*  
976 *smegmatis* mc2155. *Molecular Microbiology.* 2018;108(6):661-82.
- 977 57. Grassmann AA, Zavala-Alvarado C, Bettin E, Picardeau M, Benaroudj N, Caimano  
978 MJ. The Fur-like regulators PerRA and PerRB control a complex signaling network required  
979 for mammalian host-adaptation and virulence of *Leptospira interrogans*. submitted. 2020;
- 980 58. Brenot A, King KY, Caparon MG. The PerR regulon in peroxide resistance and  
981 virulence of *Streptococcus pyogenes*. *Molecular Microbiology.* 2005;55(1):221-34.
- 982 59. Rea RB, Gahan CGM, Hill C. Disruption of putative regulatory loci in *Listeria*  
983 *monocytogenes* demonstrates a significant role for Fur and PerR in virulence. *Infect Immun.*  
984 2004;72(2):717-27.
- 985 60. Ricci S, Janulczyk R, Björck L. The Regulator PerR Is Involved in Oxidative Stress

986 Response and Iron Homeostasis and Is Necessary for Full Virulence of *Streptococcus*  
987 *pyogenes*. *Infect Immun*. 2002;70(9):4968.

988 61. Wu H-J, Seib KL, Srikhanta YN, Kidd SP, Edwards JL, Maguire TL, et al. PerR  
989 controls Mn-dependent resistance to oxidative stress in *Neisseria gonorrhoeae*. *Molecular*  
990 *Microbiology*. 2006;60(2):401-16.

991 62. Stewart GR, Newton SM, Wilkinson KA, Humphreys IR, Murphy HN, Robertson BD,  
992 et al. The stress-responsive chaperone  $\alpha$ -crystallin 2 is required for pathogenesis of  
993 *Mycobacterium tuberculosis*. *Molecular Microbiology*. 2005;55(4):1127-37.

994 63. Ellinghausen HC, McCullough WG. Nutrition of *Leptospira pomona* and growth of 13  
995 other serotypes: a serum-free medium employing oleic albumin complex. *Am J Vet Res*.  
996 1965;26:39-44.

997 64. Picardeau M, Brenot A, Saint Girons I. First evidence for gene replacement in  
998 *Leptospira* spp. Inactivation of *L. biflexa* *flaB* results in non-motile mutants deficient in  
999 endoflagella. *Molecular Microbiology*. 2001;40(1):189-99.

1000 65. Pappas CJ, Benaroudj N, Picardeau M. A Replicative Plasmid Vector Allows Efficient  
1001 Complementation of Pathogenic *Leptospira* Strains. *Parales RE, éditeur. Appl Environ*  
1002 *Microbiol*. 2015;81(9):3176.

1003 66. Picardeau M. Conjugative transfer between *Escherichia coli* and *Leptospira* spp. as a  
1004 new genetic tool. *Appl Environ Microbiol*. 2008;74(1):319-22.

1005 67. Poggi D, Oliveira de Giuseppe P, Picardeau M. Antibiotic resistance markers for  
1006 genetic manipulations of *Leptospira* spp. *Appl Environ Microbiol*. 2010;76(14):4882-5.

1007 68. Vincent AT, Schiettekatte O, Goarant C, Neela VK, Bernet E, Thibeaux R, et al.  
1008 Revisiting the taxonomy and evolution of pathogenicity of the genus *Leptospira* through the  
1009 prism of genomics. *PLoS Negl Trop Dis*. 2019;13(5):e0007270-e0007270.

1010 69. Zavala-Alvarado C, Benaroudj N. The Single-Step Method of RNA Purification  
1011 Applied to *Leptospira*. *Methods Mol Biol*. 2020;2134:41-51.

1012 70. Cokelaer, T, Desvillechabrol, D, Legendre, R, Cardon, M. ‘Sequana’: a Set of  
1013 Snakemake NGS pipelines. *The Journal of Open Source Software*. 2(16).

1014 71. Martin M. Cutadapt removes adapter sequences from high-throughput sequencing  
1015 reads. *EMBnet.journal*; Vol 17, No 1: Next Generation Sequencing Data AnalysisDO -  
1016 1014806/ej171200 [Internet]. 2011;  
1017 <http://journal.embnet.org/index.php/embnetjournal/article/view/200>

1018 72. Langmead B, Trapnell C, Pop M, Salzberg SL. Ultrafast and memory-efficient  
1019 alignment of short DNA sequences to the human genome. *Genome Biology*. 2009;10(3):R25.

1020 73. Liao Y, Smyth GK, Shi W. featureCounts: an efficient general purpose program for  
1021 assigning sequence reads to genomic features. *Bioinformatics*. 2013;30(7):923-30.

1022 74. R core Team. R, a language and environment for statistical computing [Internet].  
1023 2016. [https://www.gbif.org/en/tool/81287/r-a-language-and-environment-for-statistical-](https://www.gbif.org/en/tool/81287/r-a-language-and-environment-for-statistical-computing)  
1024 [computing](https://www.gbif.org/en/tool/81287/r-a-language-and-environment-for-statistical-computing)

1025 75. Love MI, Huber W, Anders S. Moderated estimation of fold change and dispersion for  
1026 RNA-seq data with DESeq2. *Genome Biology*. 2014;15(12):550.

1027 76. Benjamini Y, Hochberg Y. Controlling the False Discovery Rate: A Practical and  
1028 Powerful Approach to Multiple Testing. *Journal of the Royal Statistical Society Series B*

- 1029 (Methodological). 1995;57(1):289-300.
- 1030 77. Bolger AM, Lohse M, Usadel B. Trimmomatic: a flexible trimmer for Illumina  
1031 sequence data. *Bioinformatics*. 2014;30(15):2114-20.
- 1032 78. McClure R, Balasubramanian D, Sun Y, Bobrovskyy M, Sumby P, Genco CA, et al.  
1033 Computational analysis of bacterial RNA-Seq data. *Nucleic Acids Res*.  
1034 2013;41(14):e140-e140.
- 1035 79. Kalvari I, Argasinska J, Quinones-Olvera N, Nawrocki EP, Rivas E, Eddy SR, et al.  
1036 Rfam 13.0: shifting to a genome-centric resource for non-coding RNA families. *Nucleic  
1037 Acids Research*. 2017;46(D1):D335-42.
- 1038 80. Madeira F, Park Y mi, Lee J, Buso N, Gur T, Madhusoodanan N, et al. The EMBL-  
1039 EBI search and sequence analysis tools APIs in 2019. *Nucleic Acids Research*.  
1040 2019;47(W1):W636-41.
- 1041 81. Kelley LA, Mezulis S, Yates CM, Wass MN, Sternberg MJE. The Phyre2 web portal  
1042 for protein modeling, prediction and analysis. *Nature Protocols*. 2015;10(6):845-58.
- 1043

## Supporting information

### S1 Fig. Phylogenetic analysis of the four Fur-like regulators of *L. interrogans*.

Extended phylogenetic tree showing the separation between PerRA (red) and PerRB (blue).

### S2 Fig. Growth of the *L. interrogans* *perRA* and *perRB* mutants in the presence of H<sub>2</sub>O<sub>2</sub>.

*L. interrogans* WT (black circles), *perRA* (cyan up-pointing triangles) and *perRB* (green down-pointing triangles) mutant strains were cultivated in EMJH medium at 30°C in the absence (A) or presence of 2 mM H<sub>2</sub>O<sub>2</sub> (B). *Leptospira* growth was assessed by absorbance at 420 nm. Data are means and standard errors of three independent biological experiments.

### S3 Fig. Analysis of the *L. interrogans* PerRB regulon.

(A) Venn diagram showing the overlap of differentially-expressed ORFs (with an adjusted p-value < 0.05) in the *perRA* and *perRB* mutants. Differentially-expressed genes in the *perRB* mutant (as determined in this study) (in green) were compared with those in the *perRA* mutant as determined previously [27] (in cyan). The down- and up-regulated ORFs in both mutants were indicated in blue and red, respectively. (B) Comparison of differentially-expressed ORFs (with an adjusted p-value < 0.05) in the *perRB* mutant and upon *L. interrogans* exposure to H<sub>2</sub>O<sub>2</sub>. Log<sub>2</sub>FC of differentially-expressed ORFs upon *L. interrogans* exposure to 1 mM H<sub>2</sub>O<sub>2</sub> (as determined previously [27]) was plotted against the Log<sub>2</sub>FC of differentially-expressed ORFs upon *perRB* inactivation. Down- and up-regulated ORFs in the *perRB* mutant were represented by blue and red symbols, respectively, and the name of selected ORFs was indicated. The dashed lines indicate a Log<sub>2</sub>FC value of zero. Please note that only differentially-expressed ORFs in both conditions were considered.

#### **S4 Fig. Characterization and complementation of the double *perAperRB* mutant strain.**

(A) Schematic representation of the double *perAperRB* mutant construction. *PerRA* (LIMLP\_10155) was inactivated by allelic exchange in the transposon *perRB* mutant. The kanamycin (Km) and spectinomycin (Spc) resistance cassettes inactivating *perRB* and *perRA*, respectively, are indicated. (B) Production of PerRA in the WT, in the single *perRA* and *perRB* mutants and in the double *perAperRB* mutant strains. *L. interrogans* strains were cultivated in EMJH medium at 30°C until the logarithmic phase and lysed by sonication. 10 µg of total lysates were resolved on a 15% SDS-PAGE and transferred on nitrocellulose membrane. PerRA was detected by immunoblot using a 1/2000 antibody dilution as described previously [30]. (C) *PerRB* expression in the WT, in the double *perAperRB* mutant and in the trans-complemented *perAperRB* mutant with the *perRB* ORF. RNAs were extracted from exponentially-grown *L. interrogans* strains and *perRB* expression was assessed by RT-qPCR in triplicate using *flaB* gene (LIMLP\_09410) as reference gene. *PerRB* expression in the *perAperRB* and trans-complemented mutant strains were normalized against that in the WT strain. (D) Growth of stationary phase-adapted WT, *perAperRB* and trans-complemented *perAperRB* mutant strains. *L. interrogans* WT (black circles), *perAperRB* mutant (pink squares) and *perAperRB* mutant trans-complemented with the *perRB* ORF (blue triangles) were cultivated in EMJH medium at 30°C until late stationary phase (7 days after the entry in the stationary phase) and used to inoculate EMJH medium. Bacteria were then cultivated at 30°C and growth was assessed by absorbance at 420 nm. Data are means and standard errors of three independent biological experiments.

#### **S5 Fig. RT-qPCR experiments in the double *perAperRB* mutant.**

RNAs were extracted from exponentially-grown *L. interrogans* strains WT or double

*perRAperRB* mutant (*m*). Expression of the indicated genes was measured by RT-qPCR using the LIMLP\_06735 as reference gene. Gene expression in the *perRAperRB* mutant was normalized against that in the WT strain. Fold change values are indicated in blue. Statistical significance was determined by a Two-way Anova test in comparison with the WT samples. \*\*\*\*, p-value<0.0001; \*\*, p-value<0.005.

**S1 Table. Distribution of the four Fur-like regulators of *Leptospira interrogans* in the genus *Leptospira*.**

**S2 Table. Complete set of ORF expression in *Leptospira interrogans* WT and M1474 *perRB* mutant.**

**S3 Table. Complete set of ORF expression in *Leptospira interrogans* WT and double *perRAperRB* mutant.**

**S4 Table. Selected down-regulated genes in the *perRAperRB* double mutant.**

**S5 Table. Selected up-regulated genes in the *perRAperRB* double mutant.**

**S6 Table. Complete set of differentially-expressed predicted non coding RNAs in the *perRB* (M1474) and in the double *perRAperRB* mutant strains of *Leptospira interrogans*.**

**S7 Table. Selected differentially-expressed non-coding RNAs in the *perRB* mutant**

**S8 Table. Selected differentially-expressed non-coding RNAs in the *perRAperRB* mutant.**

1119

1120   **S9 Table. Strains used in this study**

1121

1122   **S10 Table. Plasmids used in this study**

1123

1124   **S11 Table. Primers used in this study**

1125

## Figure legends

### Fig 1. Analysis of the four Fur-like regulators of *L. interrogans*.

(A) Schematic representation of the domain organization of a typical Fur-like regulator. The N-terminal DNA binding domain and the C-terminal dimerization domain are represented in grey and golden, respectively. The  $\alpha$ -helix and  $\beta$ -strand secondary structures are indicated below in green and blue, respectively. The His, Asp and Glu residues involved in regulatory metal coordination are designated in green. The Arg/Asn residue involved in DNA binding specificity is marked in red. The Arg/Asn (involved in DNA binding specificity) and Asp/Glu residues (involved in H<sub>2</sub>O<sub>2</sub> sensitivity) that allow distinguishing a Fur from a PerR are further emphasized with a grey arrow head. The two cysteinate motifs in the C-terminal domain involved in structural metal coordination are represented by the double blue lines in the C-terminal dimerization domain. (B) Comparison of the four Fur-like regulators of *L. interrogans* (LIMLP\_10155, LIMLP\_05620, LIMLP\_04825, LIMLP\_18590) with *B. subtilis* Fur and PerR. Primary sequence alignment was obtained by Clustal Omega (<https://www.ebi.ac.uk/Tools/msa/clustalo/>; [80]). The H4 DNA binding helix is underlined and the Arg/Asn residue involved in DNA binding specificity is designated in red. The residues of the regulatory metal coordination, including the Asp/Glu residue involved in H<sub>2</sub>O<sub>2</sub> sensitivity, are marked in green and indicated with an asterisk. The Arg/Asn and Asp/Glu residues that allow distinguishing a Fur from a PerR are further emphasized with a grey arrow head. The cysteine residues of the structural metal coordination are marked in cyan. (C) Cartoon representation of the crystal structure of LIMLP\_10155 (5NL9) and of the modeled structure of LIMLP\_05620, LIMLP\_04825 and LIMLP\_18590. The modeled structures were obtained by searching homologies between LIMLP\_05620, LIMLP\_04825 and



LIMLP\_18590 and protein with known crystal structure using PHYRE2 (<http://www.sbg.bio.ic.ac.uk/~phyre2/html/page.cgi?id=index>; [81]). Secondary structures are numbered as in (A).

**Fig 2.** (A) Phylogenetic tree with a cartoon representation showing the distribution of the 1671 sequences putatively homologous to the LIMLP\_10155 (PerRA, cyan triangle), LIMLP\_05620 (PerRB, green triangle), LIMLP\_18590 (yellow triangle) and LIMLP\_04825 (red triangle) proteins. The gray triangles represent groups which are not monophyletic with the *Leptospira* sequences and which may therefore originate from other types of PerR or have had a species-specific evolution. (B) Phylogenetic tree showing the separation between PerRA (cyan) and PerRB (green).

**Fig 3. Distribution of the four Fur-like regulators of *L. interrogans* in the genus *Leptospira*.**

Circular phylogenetic tree with inner circles indicating the homology between each Fur-like regulator of *L. interrogans* with the closest homolog among representative genomes of *Leptospira* species. The branches are colored according to their classification into the four main subclades with P1 (highly pathogenic) in red, P2 (intermediates) in magenta, S1 (saprophytes) in yellow and S2 (new clade saprophytes) in blue [68]. The inner circles are, from the inside to the outside, LIMLP\_10155, LIMLP\_05620, LIMLP\_04825 and LIMLP\_18590. The green color gradient indicates the degree of homology (See S1 Table), grey and black indicate the presence of a false positive and the absence of orthologs, respectively.

**Fig 4. Increased *PerRA* and *perRB* expression upon exposure to hydrogen peroxide.**

Exponentially growing *L. interrogans* were incubated in the absence or presence of 10  $\mu$ M (for 30 min.) or 1 mM H<sub>2</sub>O<sub>2</sub> (for 60 min.) and *perRA* (cyan circles) and *perRB* (green squares) expression was measured by RT-qPCR as described in Material and Methods section. Gene expression was normalized by that in untreated samples. Data are the means and standard errors of three independent biological replicates. P-values obtained by a Two-way Anova test indicates the statistical significance in comparison with untreated samples.

**Fig 5. Effect of *perRB* inactivation on *Leptospira* growth in the presence of superoxide-generating paraquat.**

*L. interrogans* WT containing the empty pMaORI vector (black circles), the *perRB* mutant containing the empty pMaORI vector (green triangles) or the *perRB* mutant containing the pMaORI vector expressing LIMLP\_05620 (red squares) were cultivated in EMJH medium in the absence (A) or in the presence of 2  $\mu$ M Paraquat (B). Growth was assessed by measure of absorbance at 420 nm. Data are means and standard errors of three independent biological replicates.

**Fig 6. Effect of concomitant inactivation of *perRA* and *perRB* on *Leptospira* growth in the presence of ROS and virulence.**

*L. interrogans* WT (black circles), the single *perRA* mutant (cyan up-pointing triangles), the single *perRB* mutants (green down-pointing triangles) or the double *perRAperRB* mutant (pink squares) were cultivated in EMJH medium in the absence (A), or in the presence of 2 mM H<sub>2</sub>O<sub>2</sub> (B) or of 2  $\mu$ M paraquat (C). Complementation of the double *perRAperRB* mutant with *perRB* ORF (presented in (D)) was performed by cultivating *L. interrogans* WT containing the empty pMaORIgenta vector (black circles), the double *perRAperRB* mutant containing the empty pMaORIgenta vector (pink squares) or the double *perRAperRB* mutant

containing the pMaORlgenta vector expressing LIMLP\_05620 (blue triangles) in the presence of 2  $\mu$ M paraquat. Growth was assessed by measure of absorbance at 420 nm and the data are means and standard errors of three independent biological replicates. (E) Virulence was assessed by infecting hamsters (n=4) by peritoneal route with  $10^4$  of WT (black circles), single *perRA* or *perRB* mutants (cyan and green triangles, respectively), or the double *perRAperRB* mutant (pink squares) as described in Material and Methods section. (F) Complementation of the double *perRAperRB* mutant with *perRB* was performed by infecting hamsters (n=8) by peritoneal route with  $10^6$  of WT containing the empty pMaORlgenta vector (black circles), of the double *perRAperRB* mutant containing the empty pMaORlgenta vector (pink squares) or the double *perRAperRB* mutant containing the pMaORlgenta vector expressing LIMLP\_05620 (blue triangles).

# **Fig 7. Differential gene expression in the *perRAperRB* mutant.**

(A) Venn diagram showing the overlap of differentially-expressed ORFs (with an adjusted p-value < 0.05) in the double *perRAperRB* mutant (in pink) with those of the *perRA* mutant (as determined by Zavala-Alvarado *et al.* [27]) (in cyan) and of the *perRB* mutant (as determined in this study) (in green). (B)-(D) Volcano scatter representation of differentially-expressed genes in the *perRAperRB* mutant (B), in the single *perRA* mutant (as determined by Zavala-Alvarado *et al.* [27]) (C), and in the single *perRB* mutant (as determined in this study) (D). Red and blue dots indicate significantly up- and down-regulated genes, respectively, with a Log<sub>2</sub>FC cutoff of  $\pm 1$  (dashed vertical lines) and p-value<0.05. Selected genes are labelled.

# **Fig 8. Comparison of differential gene expression in the double *perRAperRB* mutant with that in the single *perRA* and *perRB* mutants.**

Expression of selected genes of the TonB-dependent transport cluster (A), involved in

oxidative stress and redox homeostasis (B), in regulation and signaling (C), and in virulence (D) determined by RNASeq in the double *perRAperRB* mutant was compared to that in the single *perRA* mutant determined by Zavala-Alvarado *et al.* [27] and single *perRB* mutant (as determined in this study). Differential expression in each mutant strain was normalized with that in the WT strain. Gene names are indicated on the right. The Heat Map color from blue to red indicates low to high Log<sub>2</sub>FC.

**Fig 9. Complementation of the *perRAperRB* mutant with *perRB* restores expression of virulence associated genes.**

The WT containing the empty pMaORIGenta vector (black circles), the *perRAperRB* mutant containing the empty pMaORIGenta vector (pink circles) and the complemented *perRAperRB* mutant (blue circles) strains were cultivated in EMJH medium until the exponential phase. Cells were harvested and RNAs were purified, and the expression of *lvrA*, *lvrB*, *ligA*, *ligB*, *clpB*, *hsp20* and *hsp15* was measured by RT-qPCR. Gene expression was normalized by that in the WT strains. Data are the means and standard errors of three independent biological replicates. P-values obtained by a Two-way Anova test indicates the statistical significance in comparison with WT samples.

**Fig 10. Non-coding RNAs expression in the double *perRAperRB* mutant.**

Differential expression of selected ncRNAs (LepncRNA38, 49, 105, and 130) in the *perRAperRB* mutant (determined in this study) <sup>(a)</sup> was compared to those in the single *perRA* mutant, as determined by Zavala-Alvarado *et al.* [27] <sup>(b)</sup>, in the single *perRB* mutant (determined by this study) <sup>(a)</sup>, and upon exposure to 1 mM H<sub>2</sub>O<sub>2</sub> for 1h00 as determined by Zavala-Alvarado *et al.* [27] <sup>(b)</sup>. The location of the ncRNAs LepncRNA38, 49, 105, and 130 were represented schematically with the adjacent or overlapping ORFs. The values indicate

1251 the Log<sub>2</sub>FC of ncRNAs expression normalized with that in WT and the respective expression  
1252 of these ORF (Log<sub>2</sub>FC) are indicated into parenthesis with the color corresponding to that of  
1253 the ORF in the cartoon. NSC, non-significantly changed.



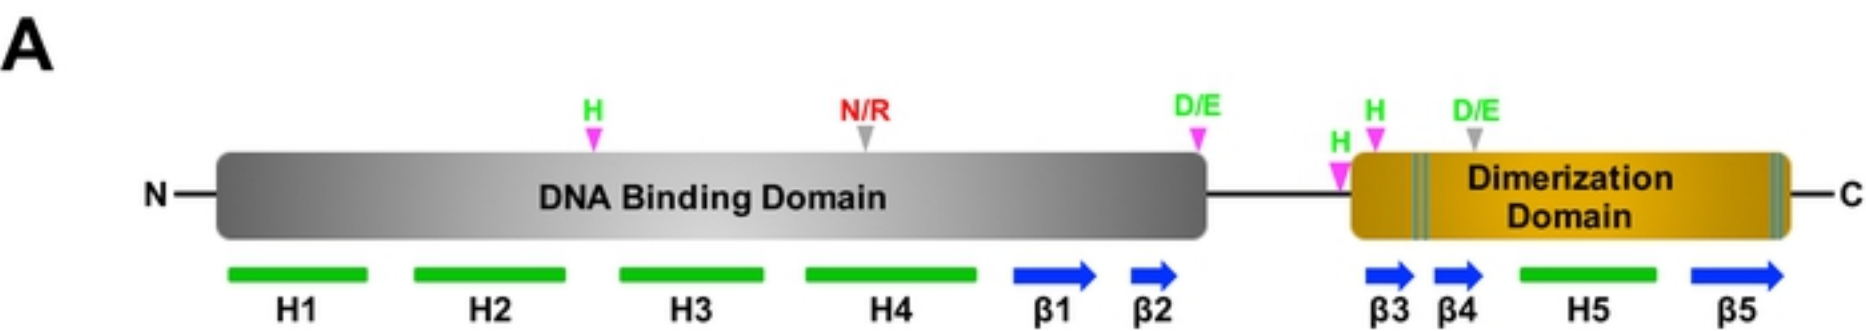

**B**

|        |                                                               |     |
|--------|---------------------------------------------------------------|-----|
| BsFur  | -----MENRIDRIKKQLHSSSYKLTPQREATVRVLLNEED*HLSAEDVY             | 44  |
| BsPerR | -----MAAHELKEALETCLKETGVRITPQRHAILEY-LVNSMAHPTADDIY           | 44  |
| 10155  | -----MKDSYERSKKILEDAGINVTVQRLQMANL-LLSKPQHLTADQVF             | 43  |
| 05620  | -----MESLFAKKVCL---TPVEIERRLKSVSIOPTIQIRISICQY-VLCEADHPTAEVVK | 51  |
| 04825  | MNREKQEAAILNKTPAVRMEMQTFSEYLOKEGLKITNQRMLVAER-IFSLHNHFTAEGLL  | 59  |
| 18590  | -----VESKRPVLRNFRQAGEILKV-LEMAKGPLSIKEIY                      | 34  |
| BsFur  | LLVKEKSPEIGLATVYRTLELLTELKVVDKINFGD-GVSRD*DLRKEGAAHF*HHLVCMEC | 103 |
| BsPerR | KALEGKFPNMSVATVYNLRFVRESGLVKELTYGD-ASSRDFVT----SDHYHAICENC    | 99  |
| 10155  | QLINEHMPNASRATIFNLKLFAEKGIIVNLELKS-GITLYDSNV----VHHHHAIDEKT   | 98  |
| 05620  | EWVDSRSFKMSLATVYNTLNILVSAGLLREFKFSCLGKSVYDSNI----IDHYHFFDEKS  | 107 |
| 04825  | EEFKDQRDQISKATIIYRILSIMVSAGLLQEHNFGK-DYKYYEHIIG--HKHHDHIICTVC | 116 |
| 18590  | ELSRKNLDNLGIATVYRAVNHLMETGTIHEIHLPG-ESSRFEASR----HHHHHFHCKQC  | 89  |
| BsFur  | GAVDEIEEDLLEDVEEIIERDWKFKIKDHRLTFHGI*CHRCNGK-----ETE-         | 149 |
| BsPerR | GKIVDFHYPGLDEVEQLAAHVTGFKVSHRLEIYGV*QEC*SKK-----ENH-          | 145 |
| 10155  | GEIYDISLDSKLQEKVLSELKQDFKLKTGSS-----LENCNLSITLKGKKNP-         | 145 |
| 05620  | GKFHDIDPSLLSL---SSKLPPEFLVNKTDILLTGNLVSET-----                | 145 |
| 04825  | GKIV*EFLDERIEQLQEQA*AKENGFKITGHSLNIYGTCNEHSSS-----K---        | 160 |
| 18590  | DRVYDIEICPI----PLDKSPKGFTVDTHEIILYGT*CSDCNSK-----AR--         | 130 |

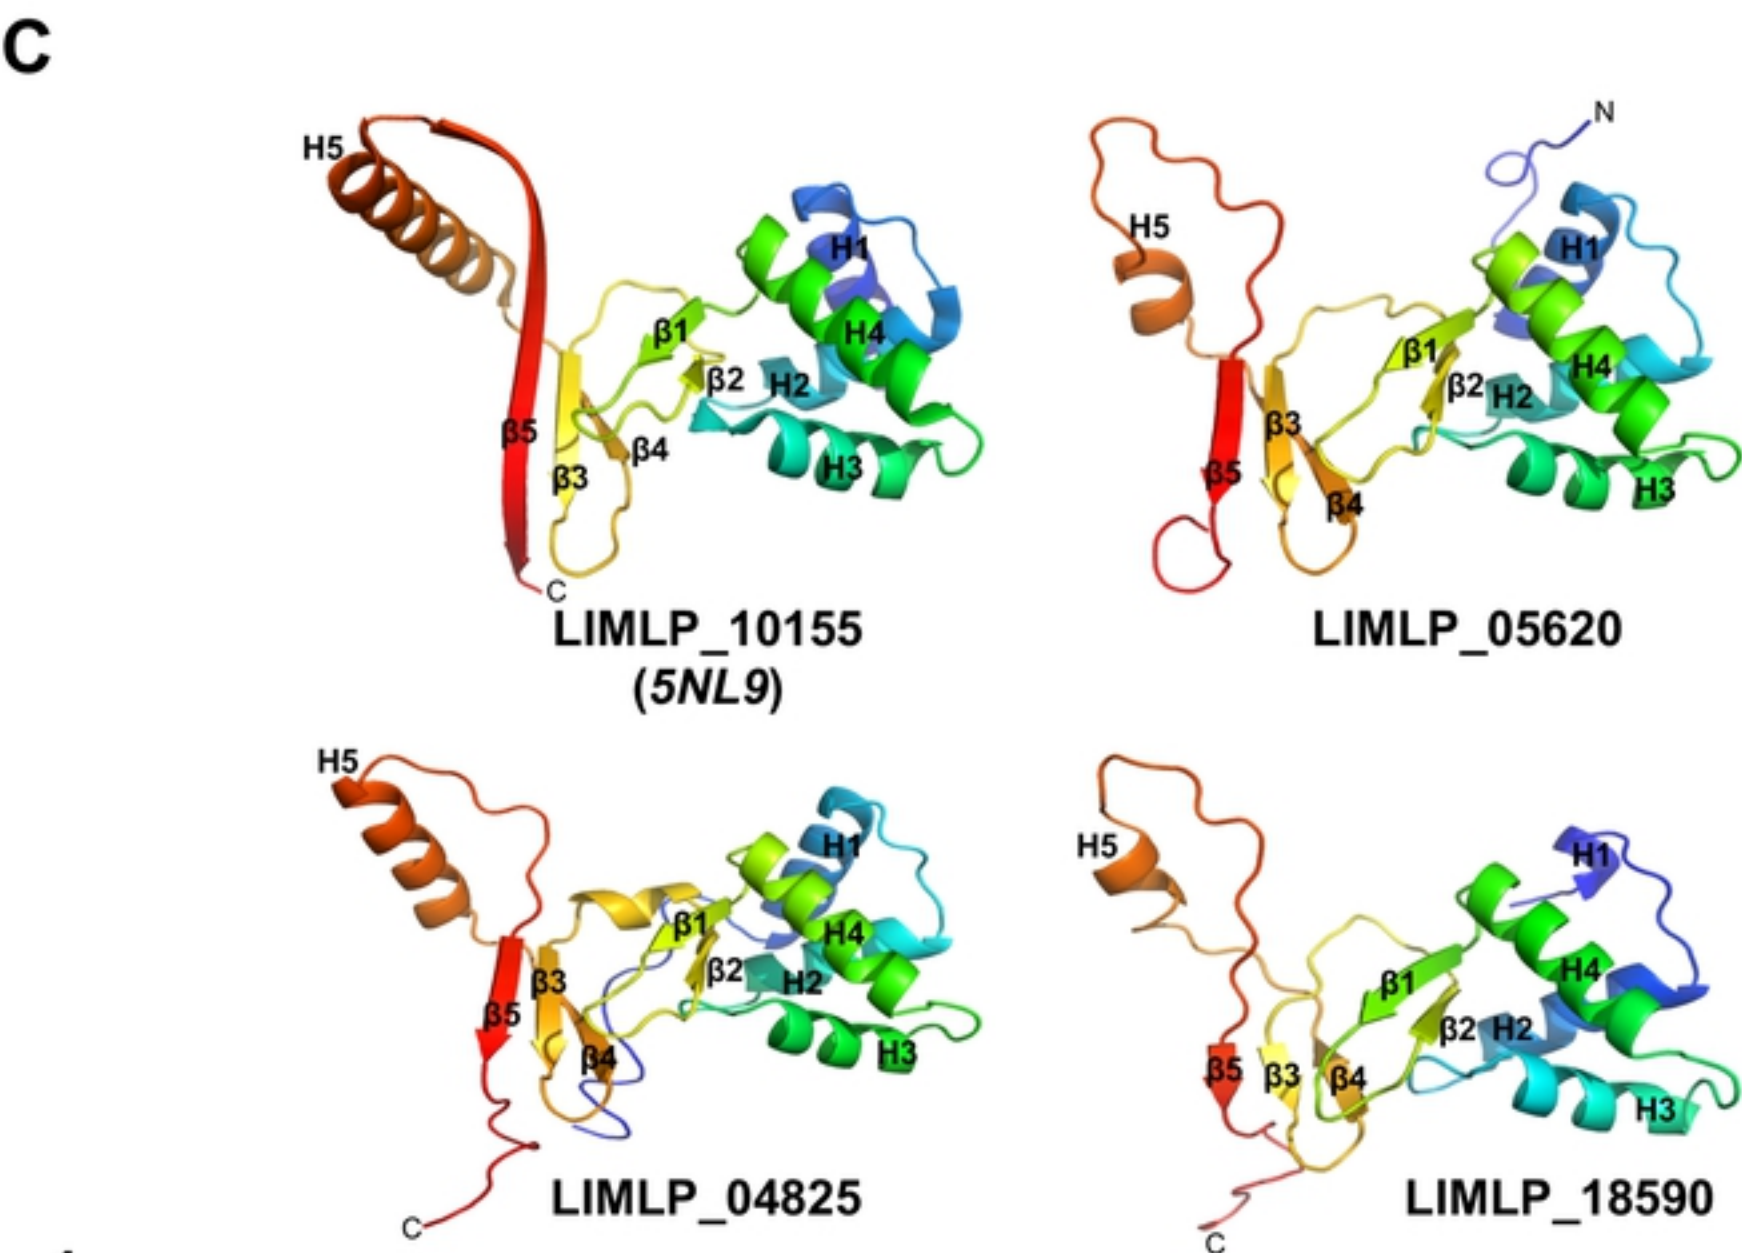

**Fig 1**

A

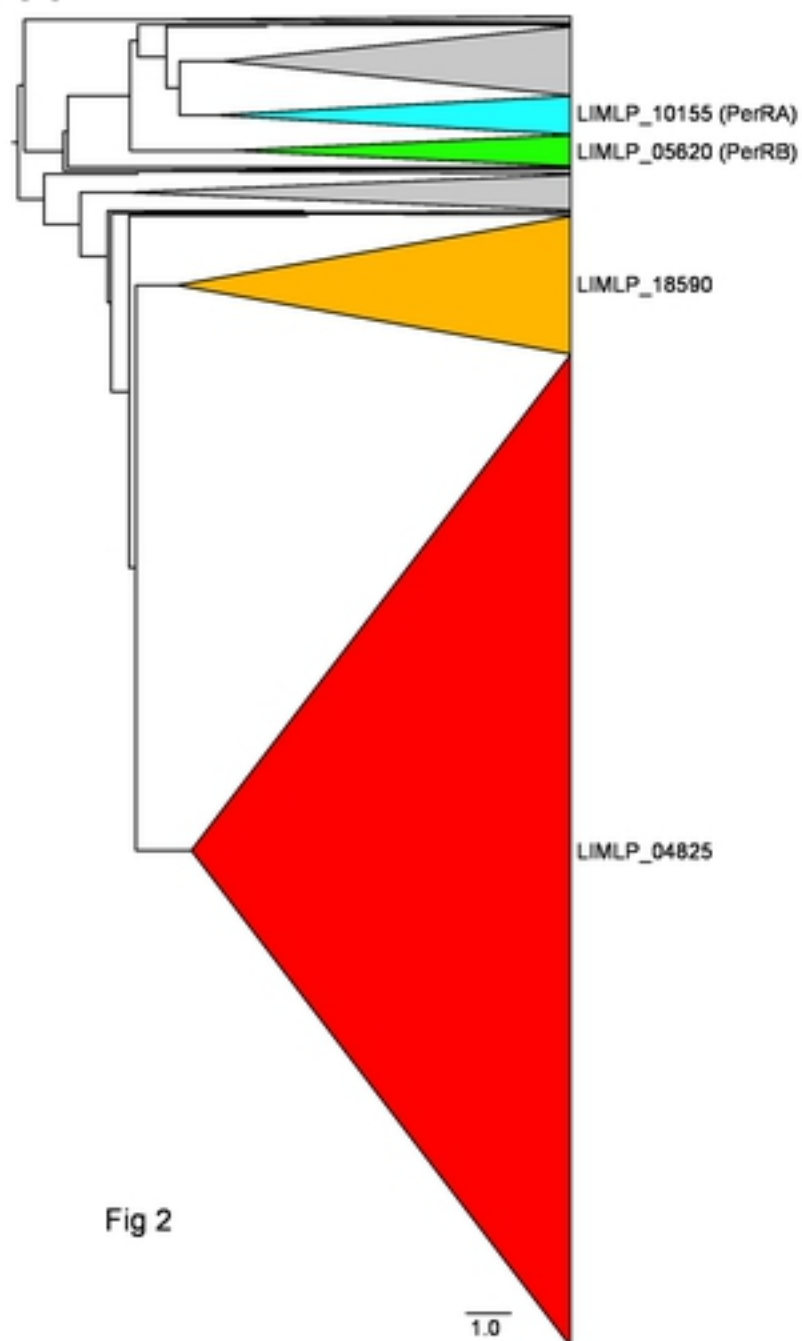

B

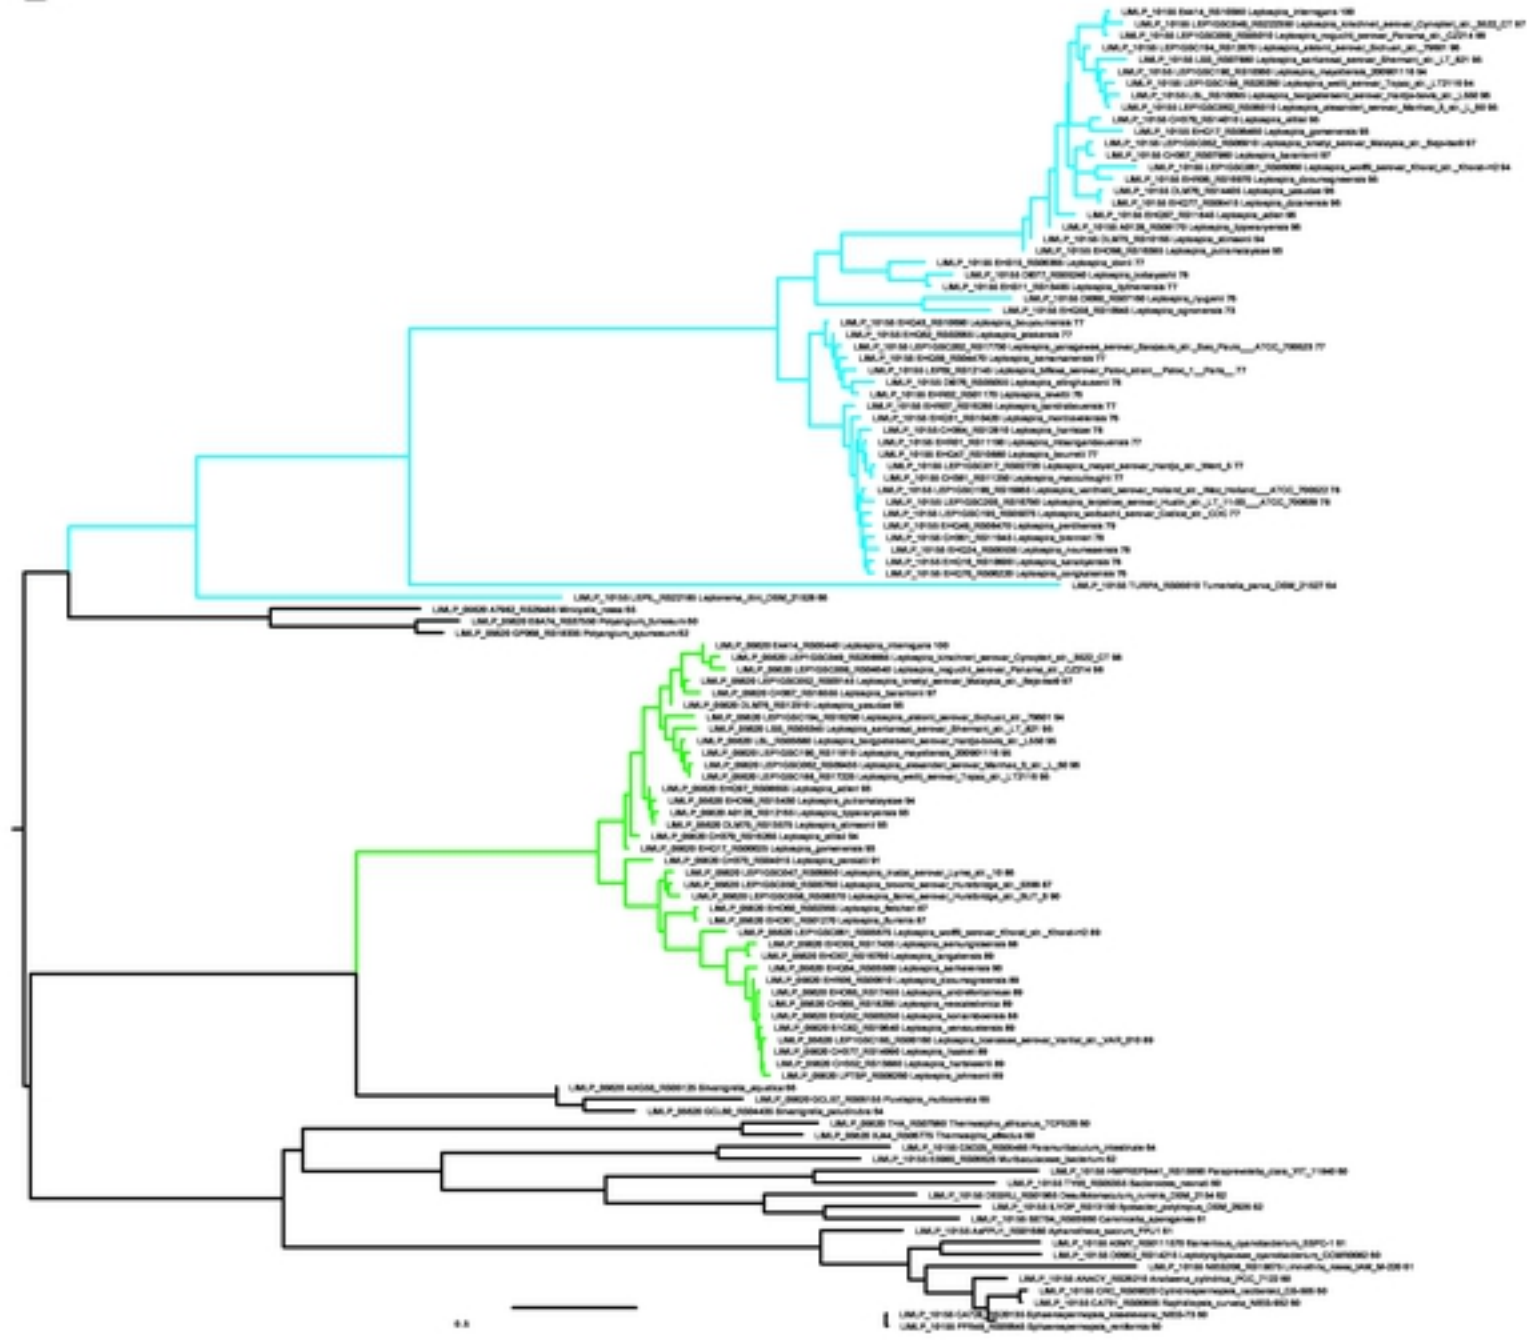

Fig 2



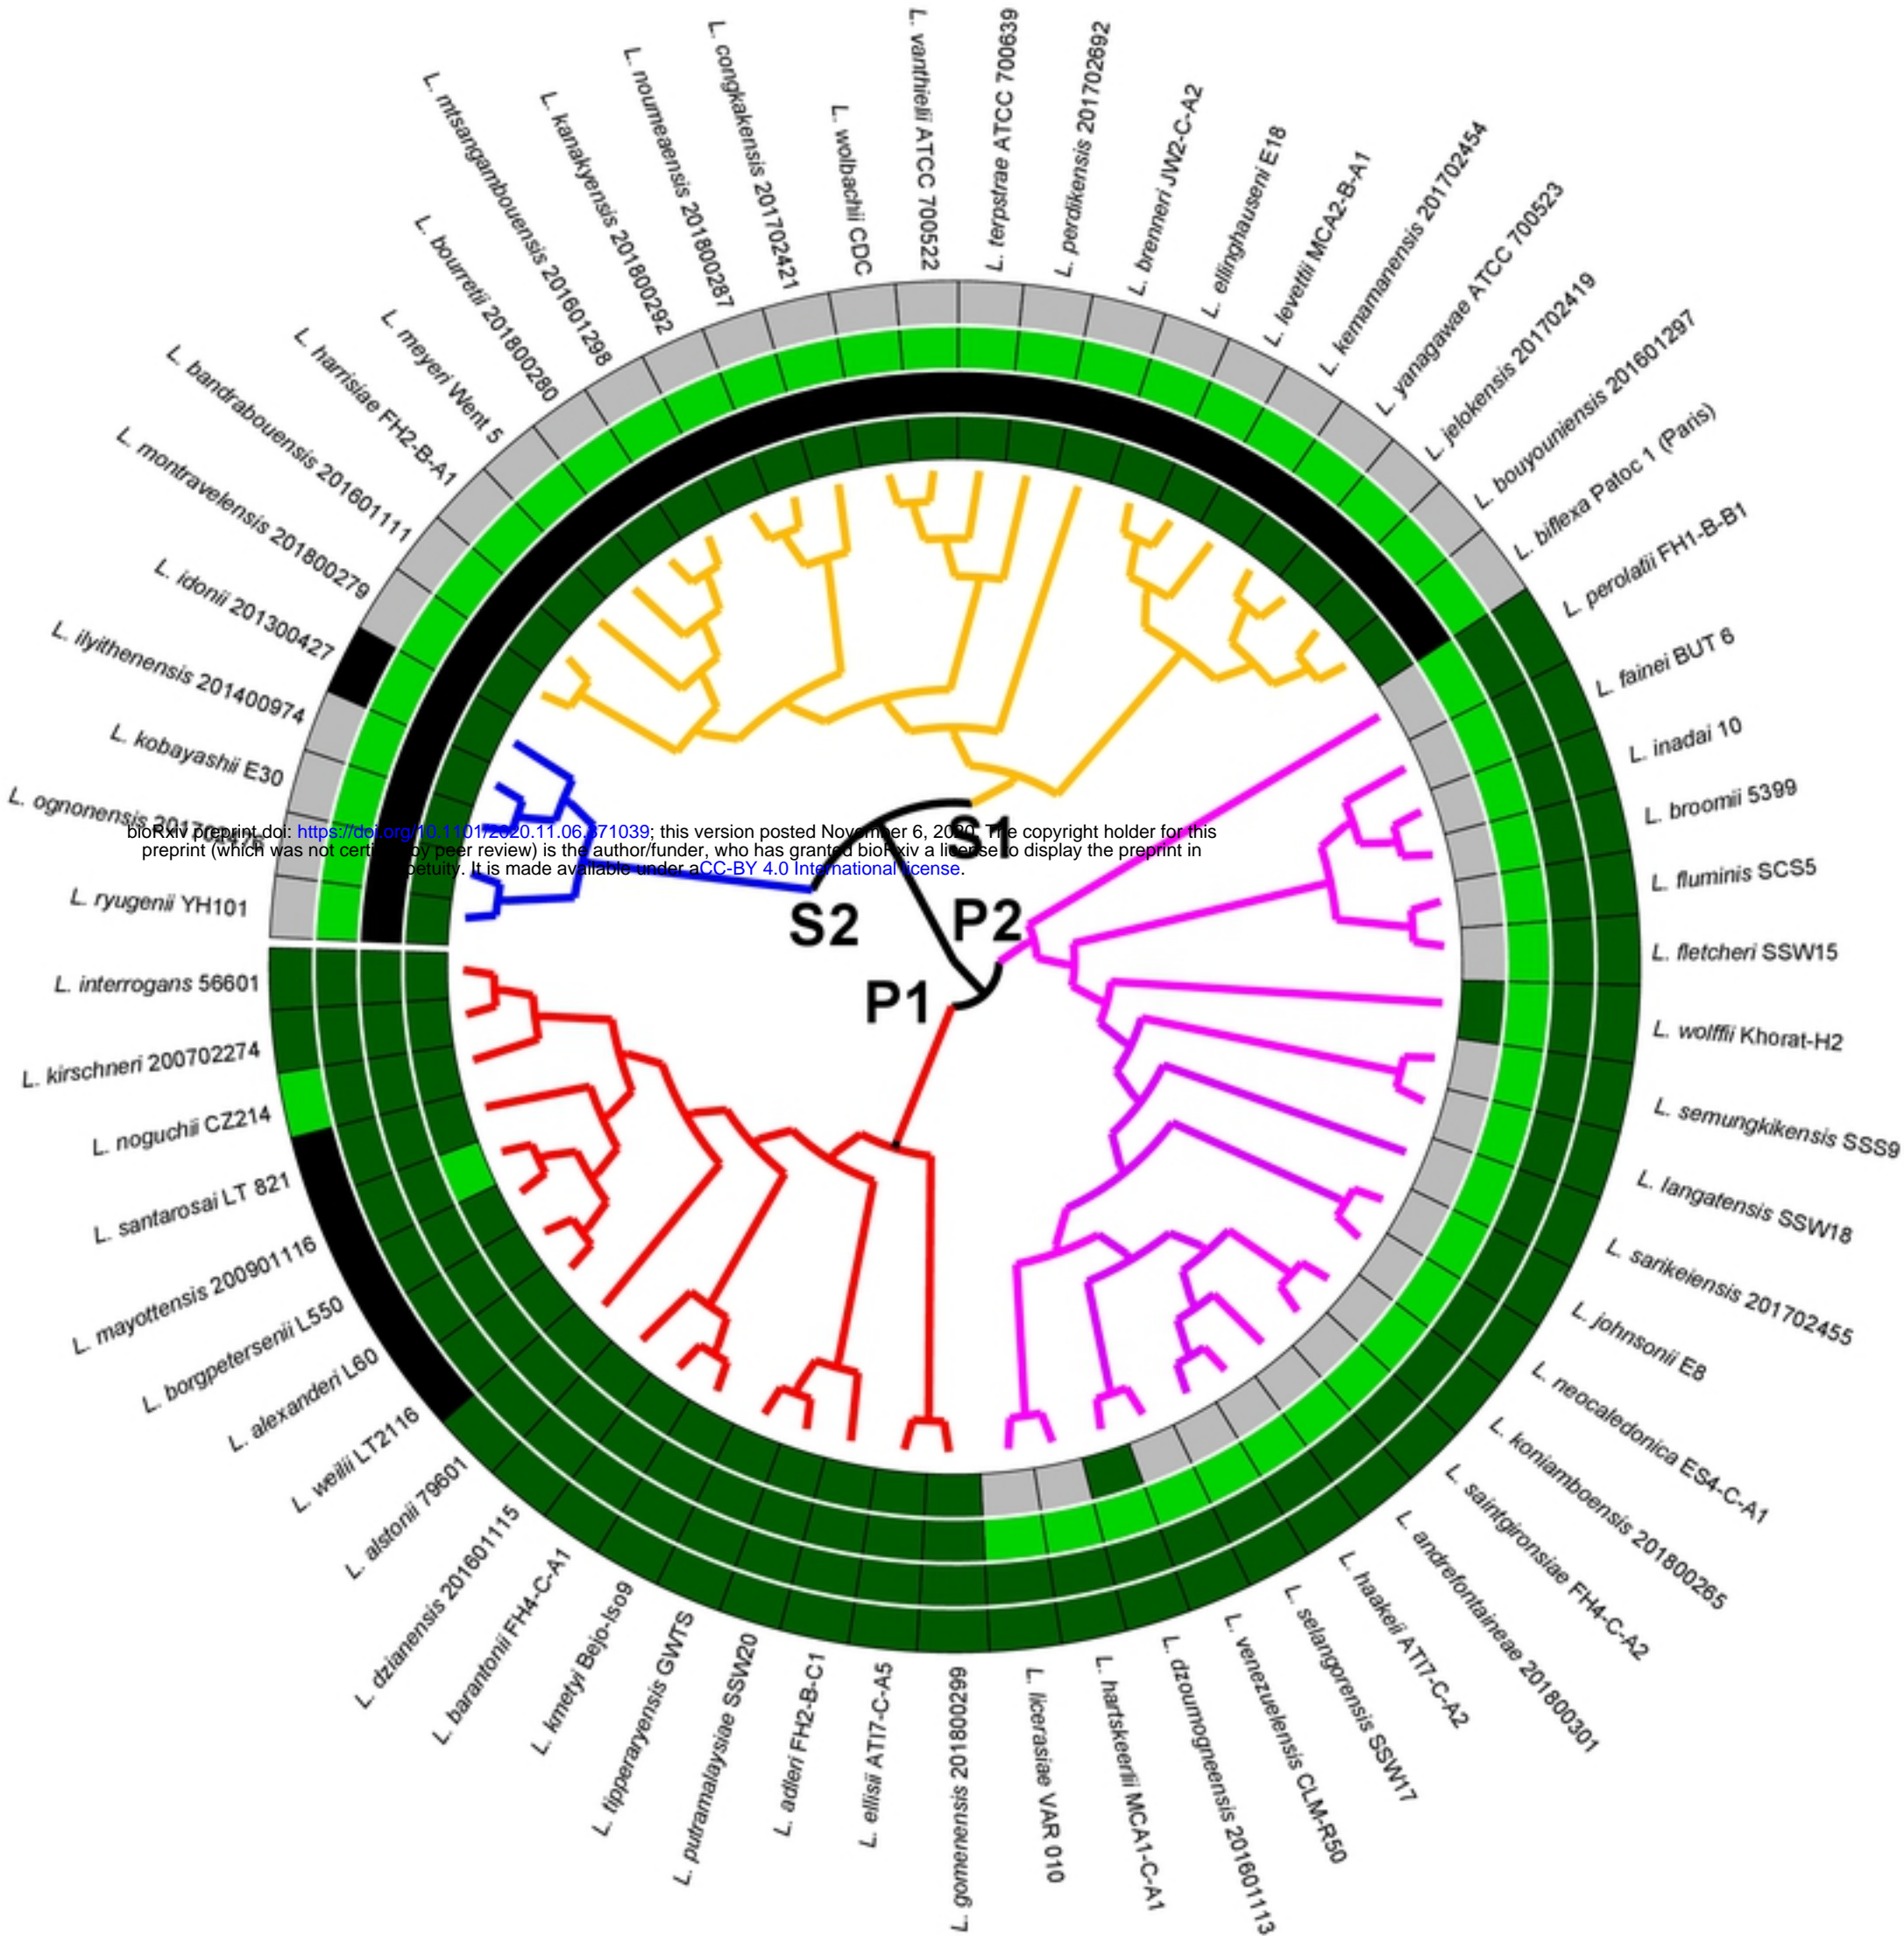

**Fig 3**



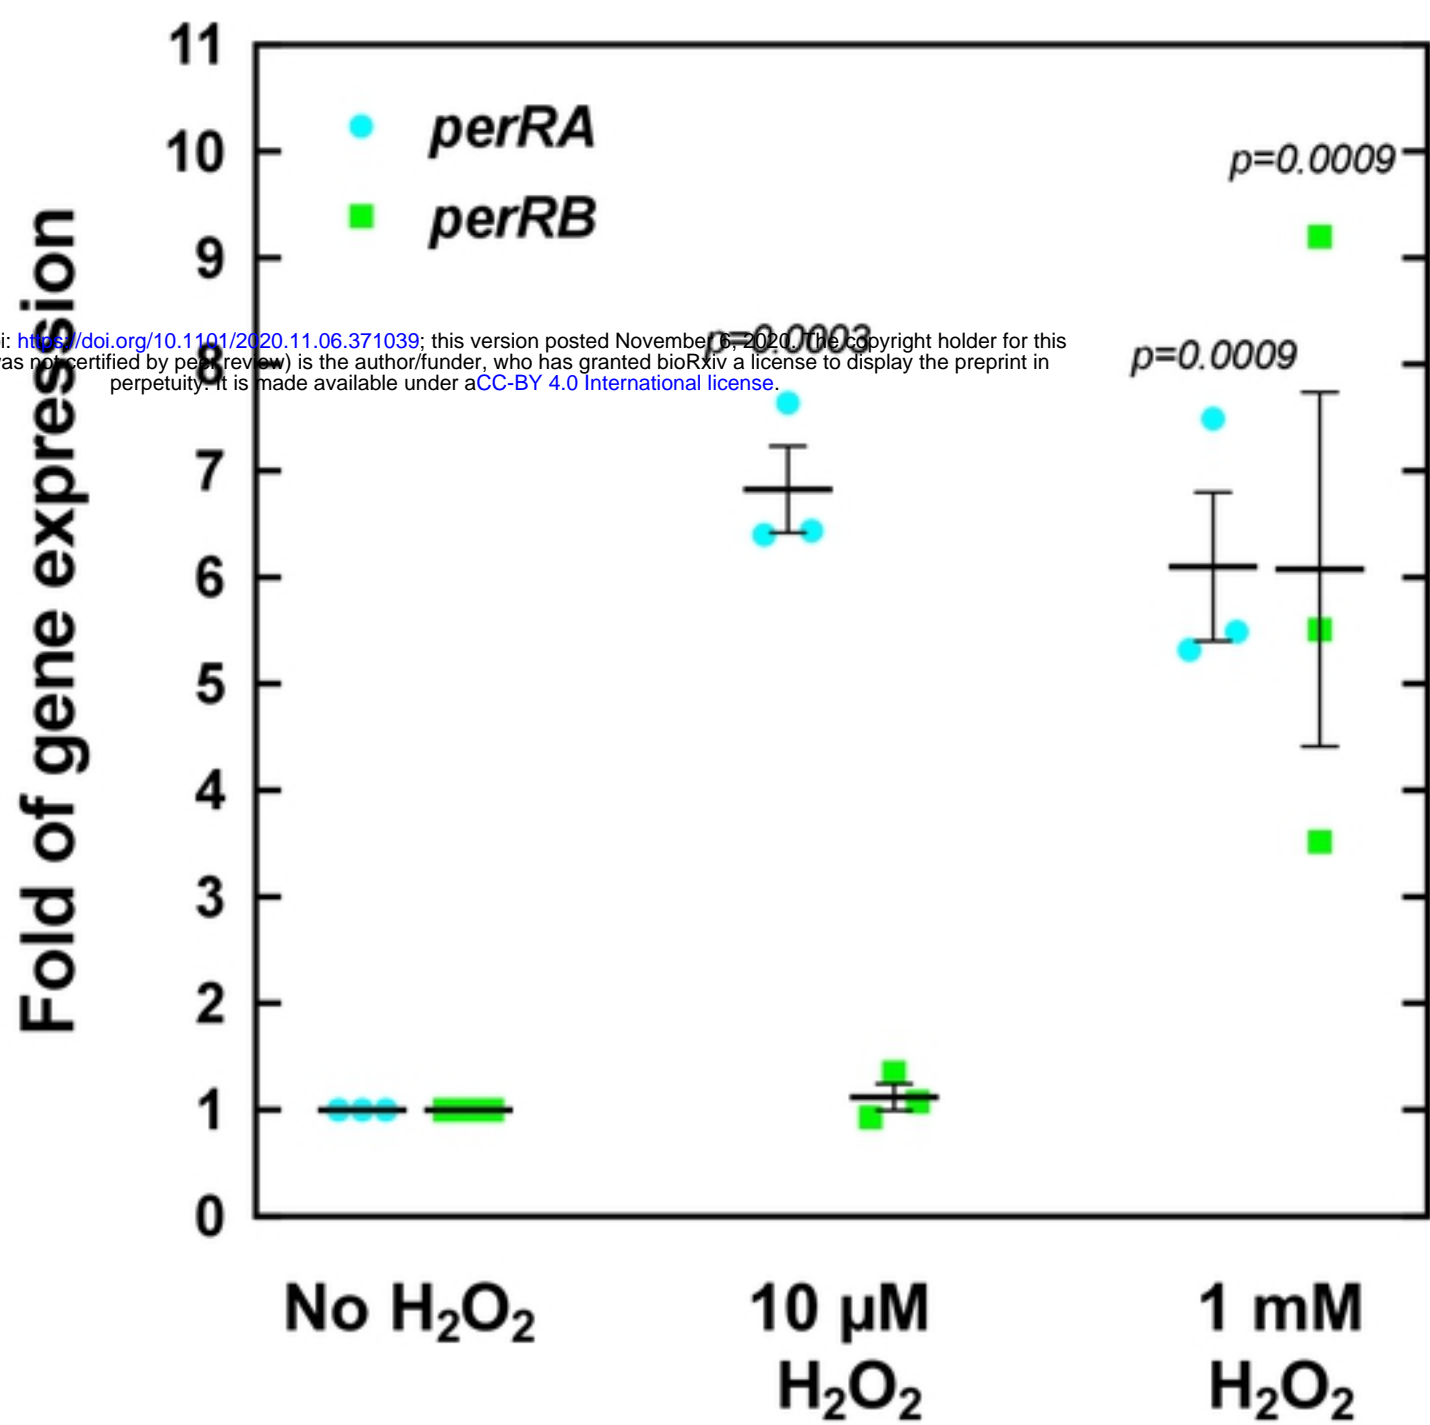

Fig 4

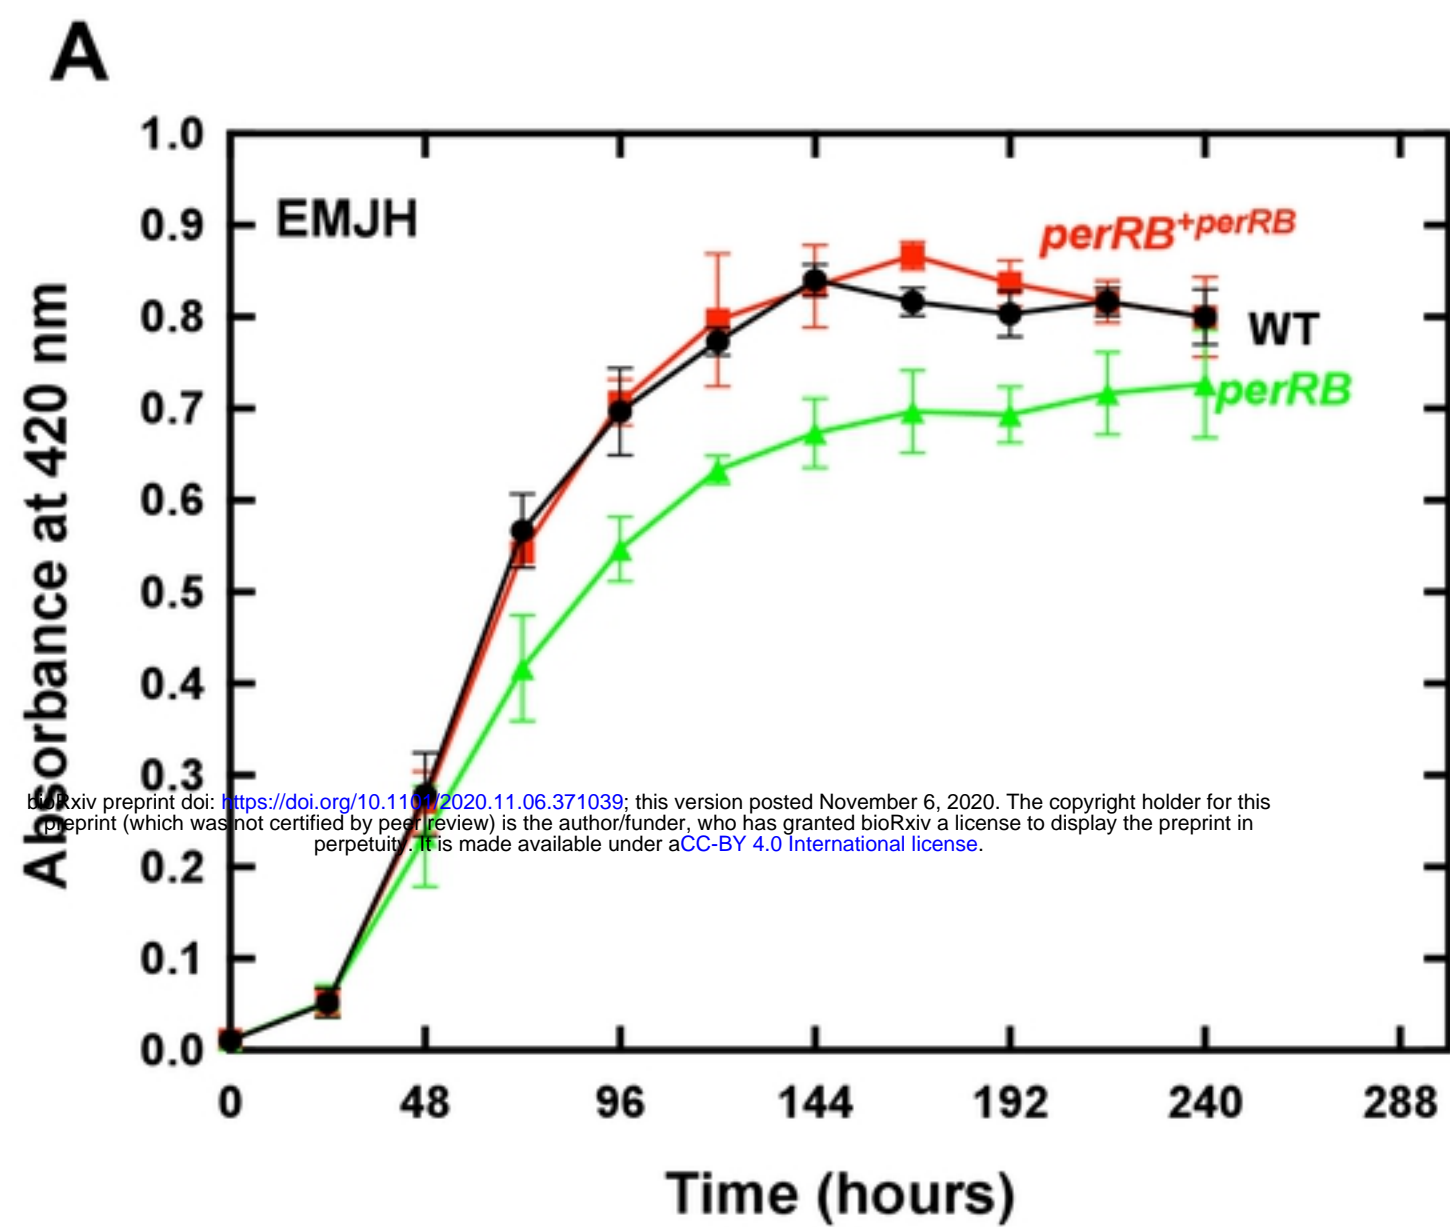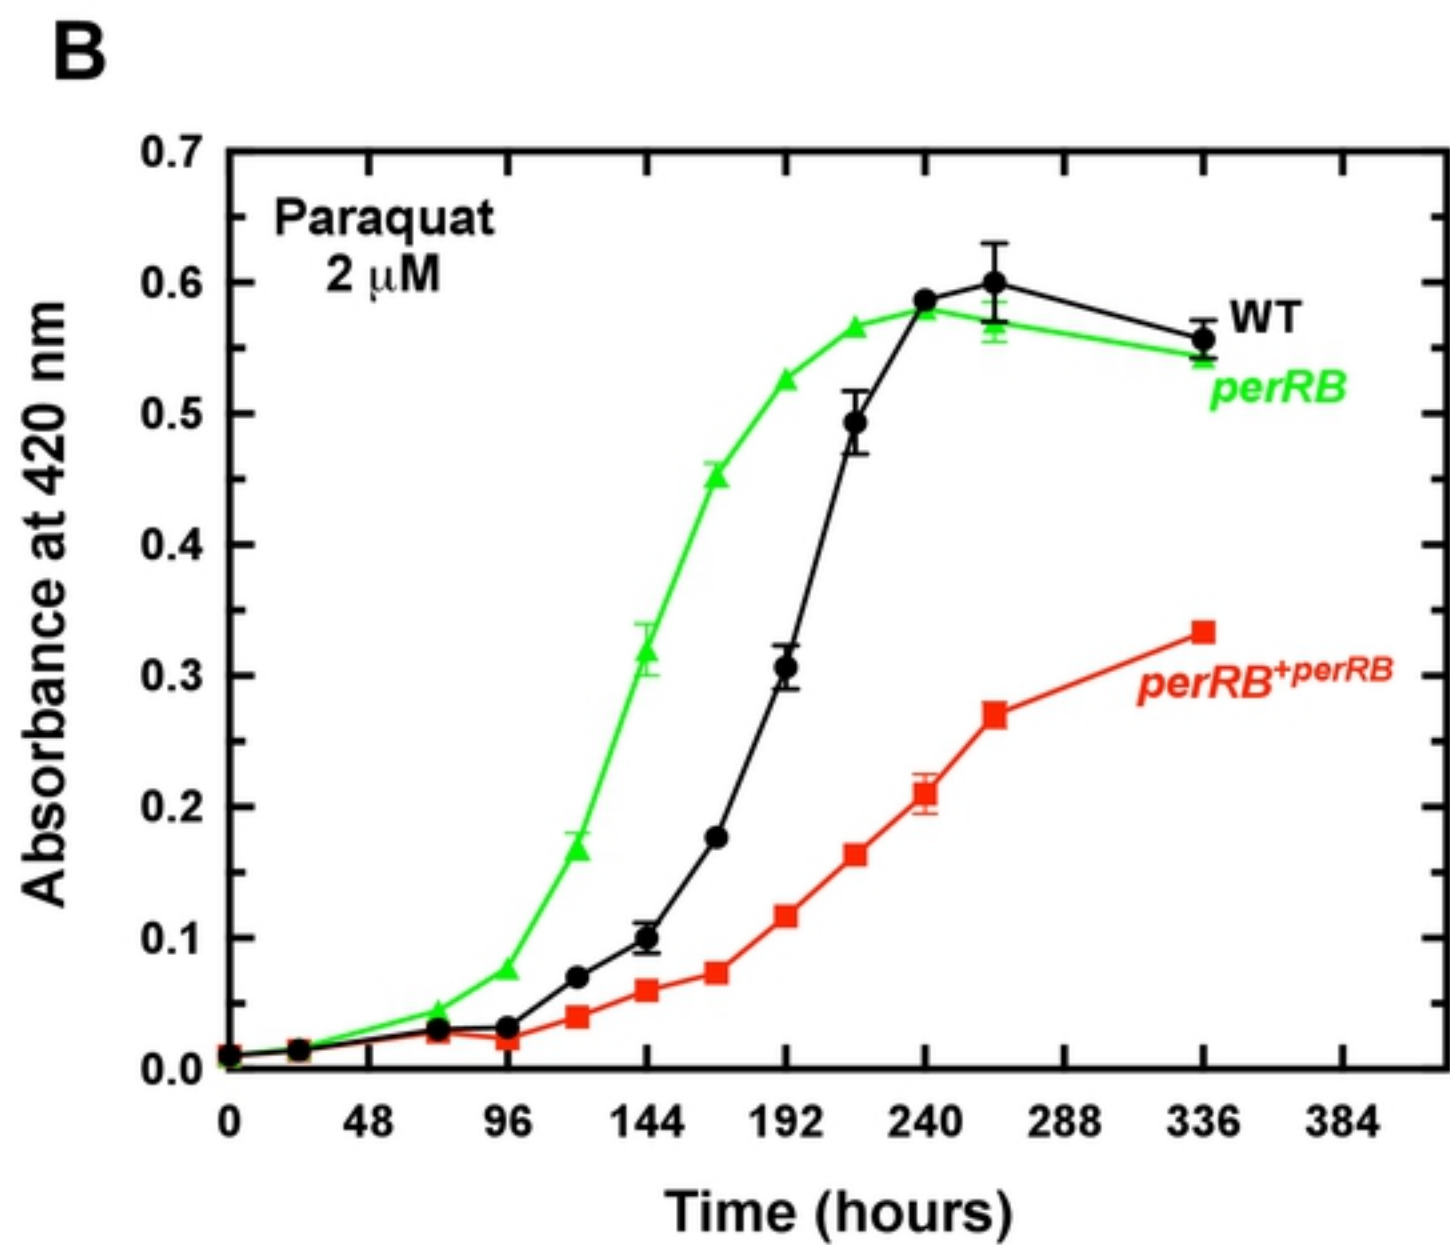

**Fig 5**

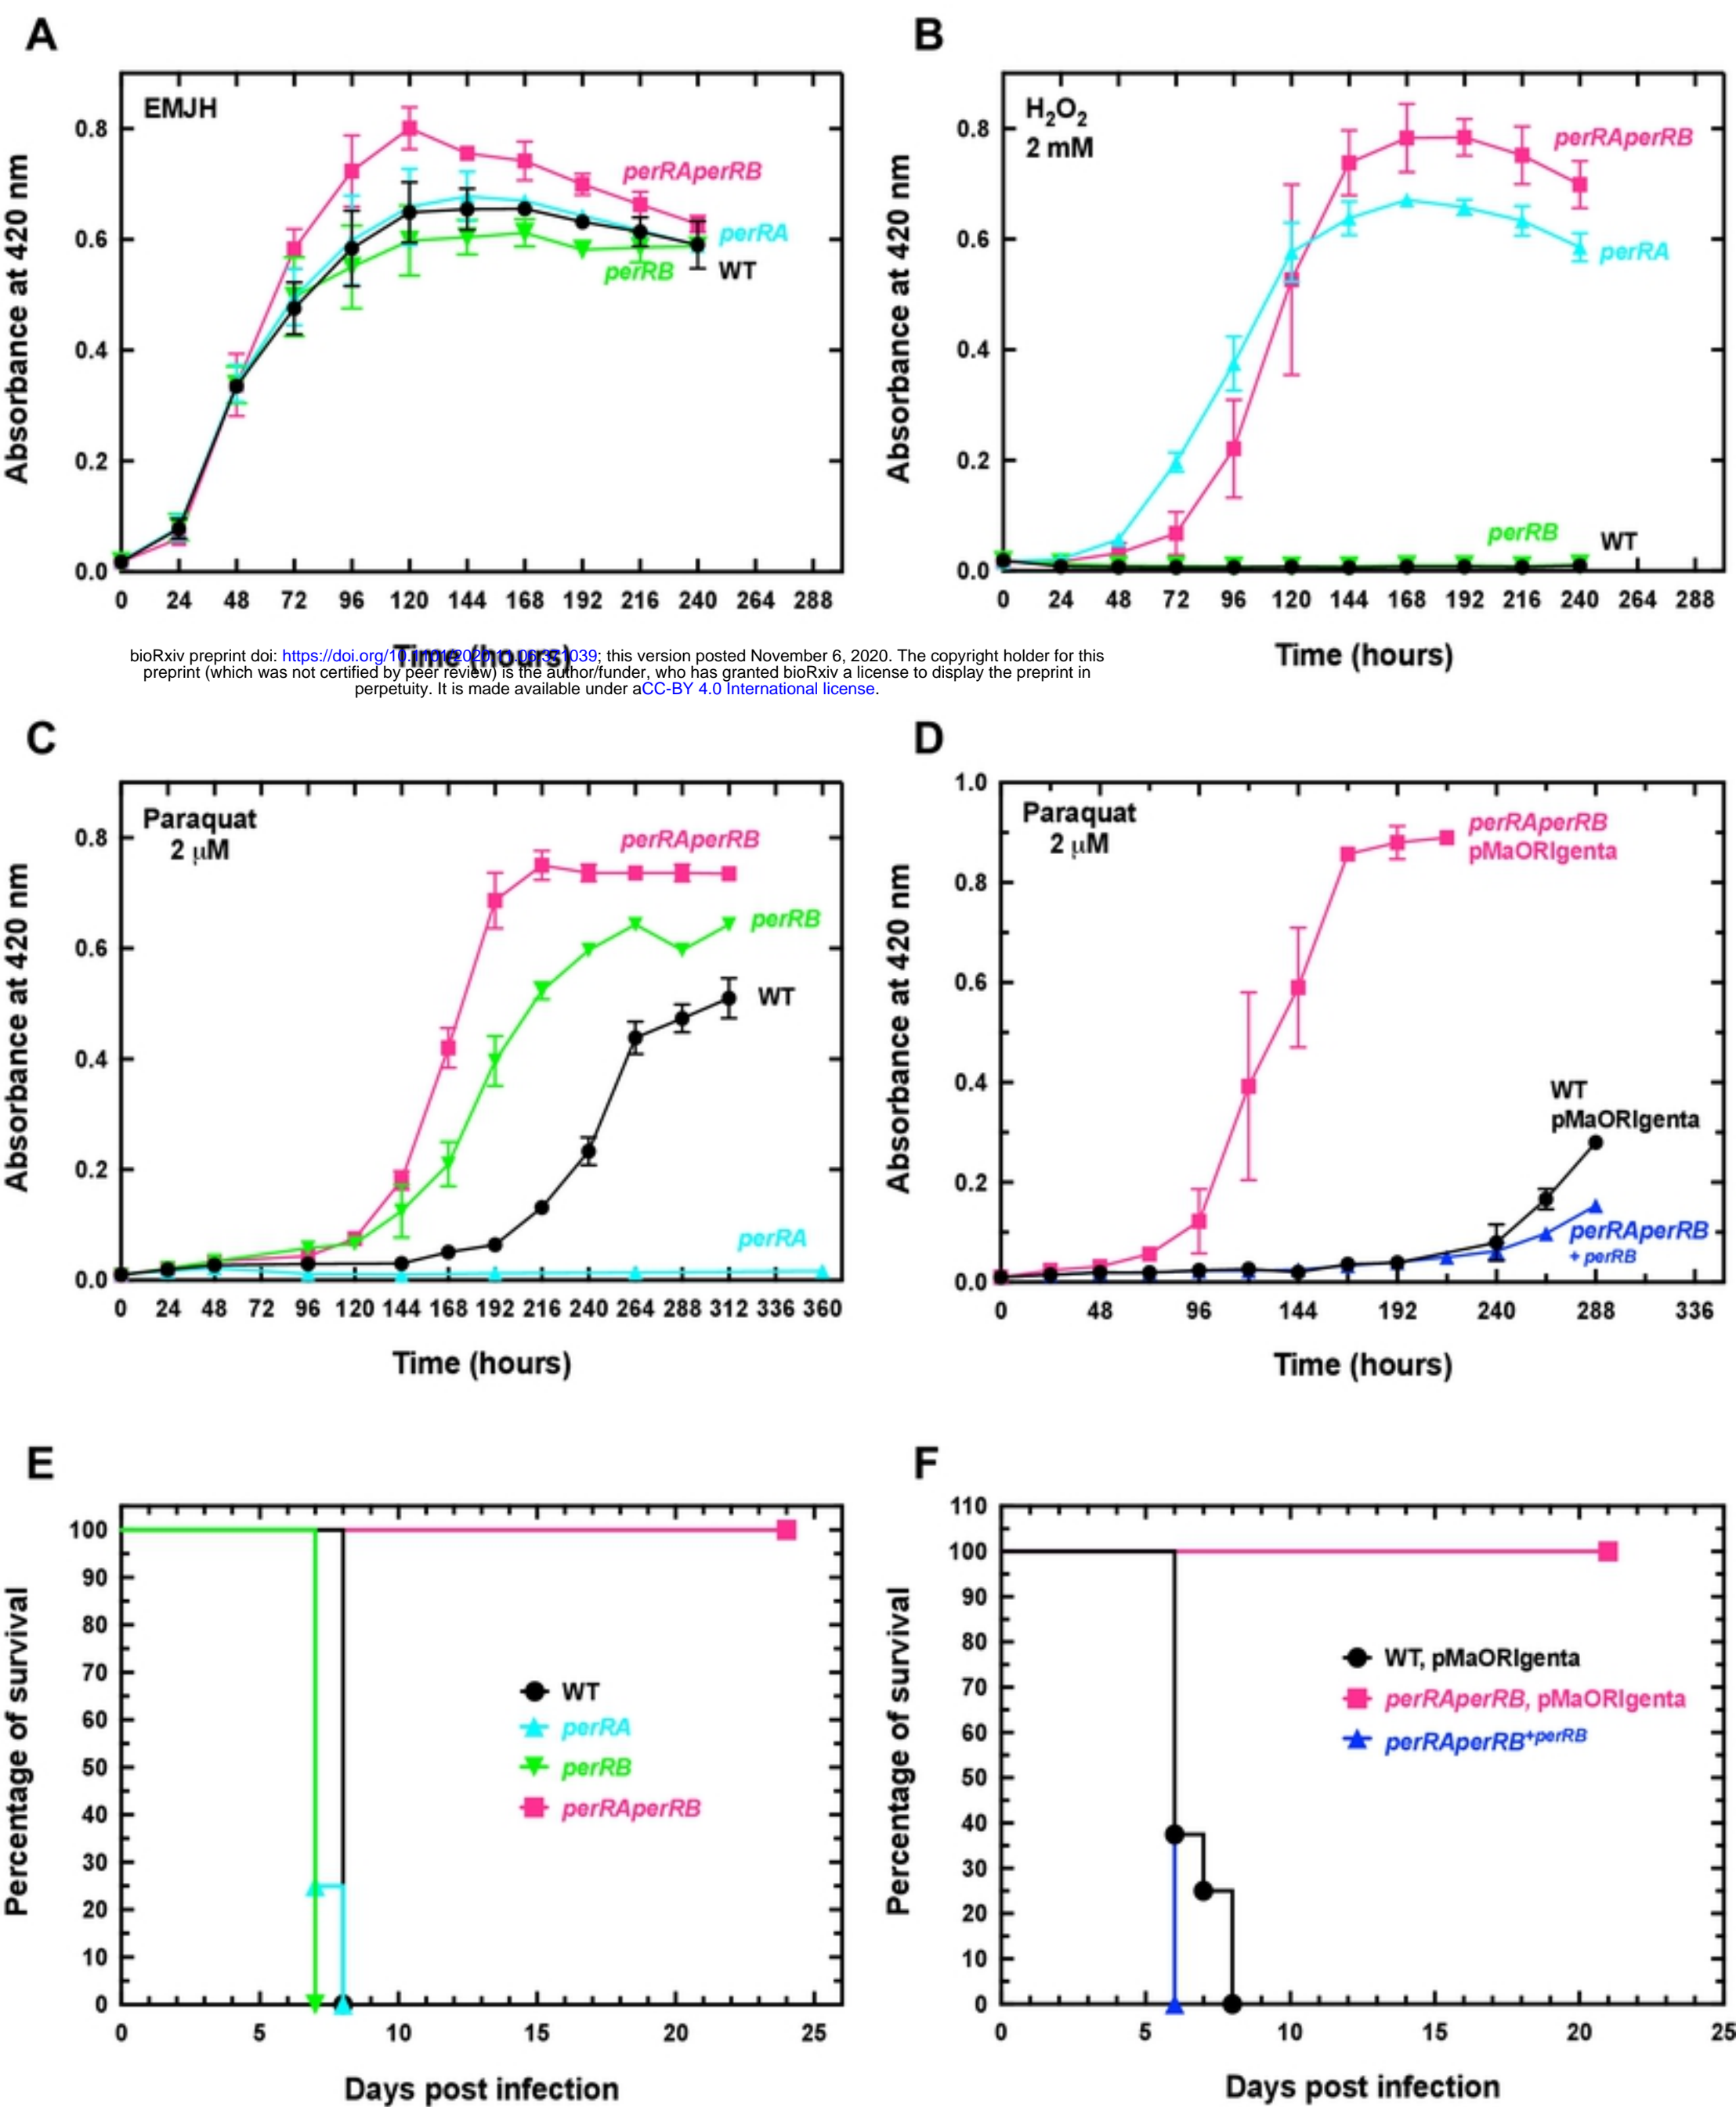

**Fig 6**

**A**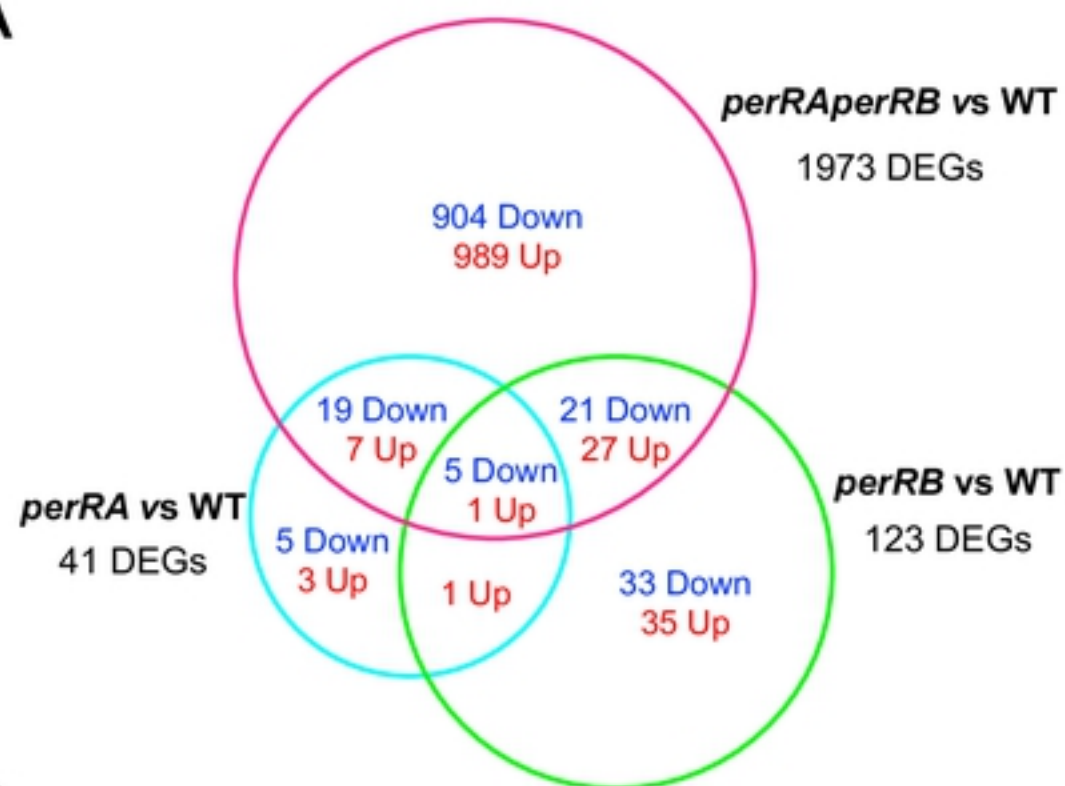**B**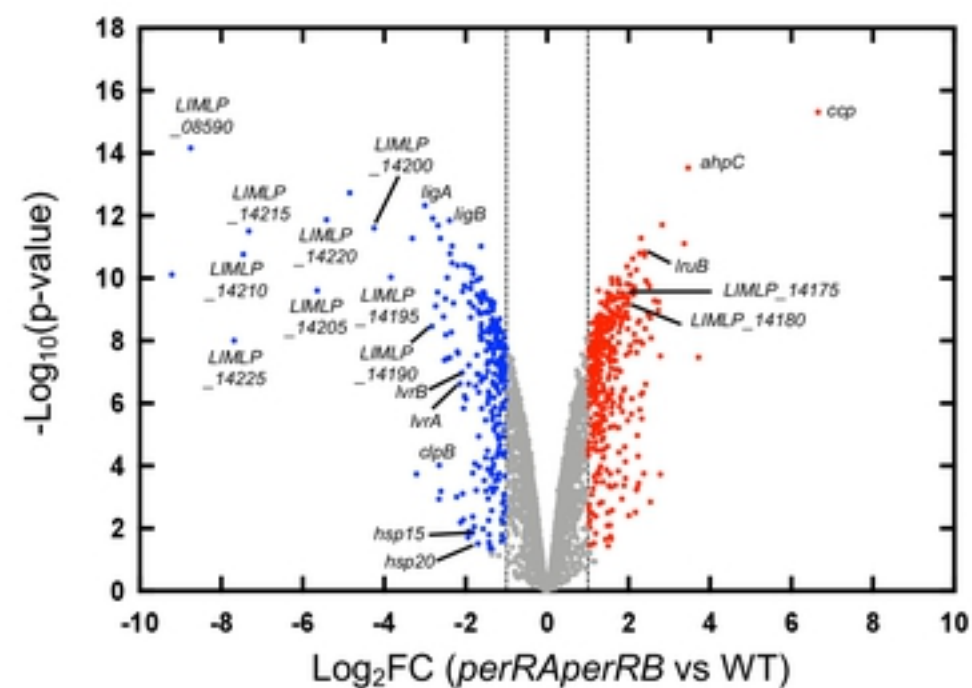**C**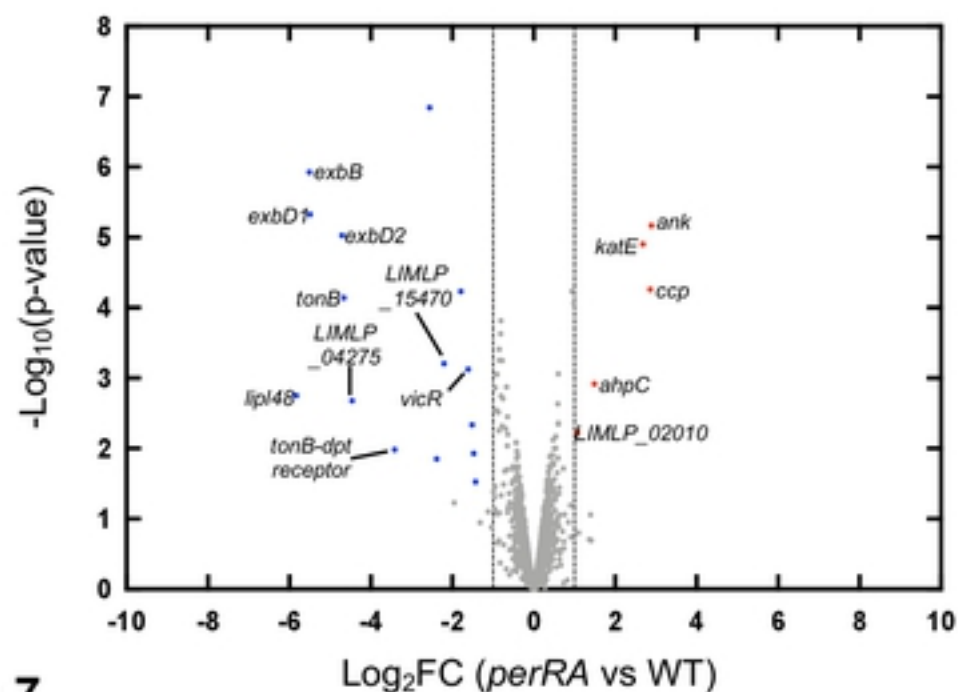**D**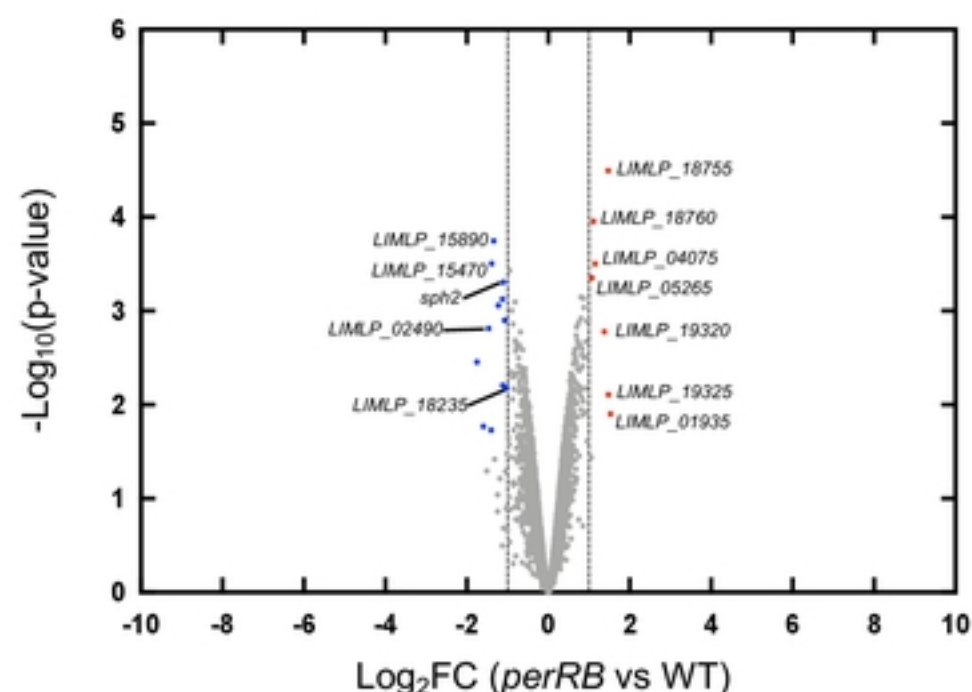**Fig 7**



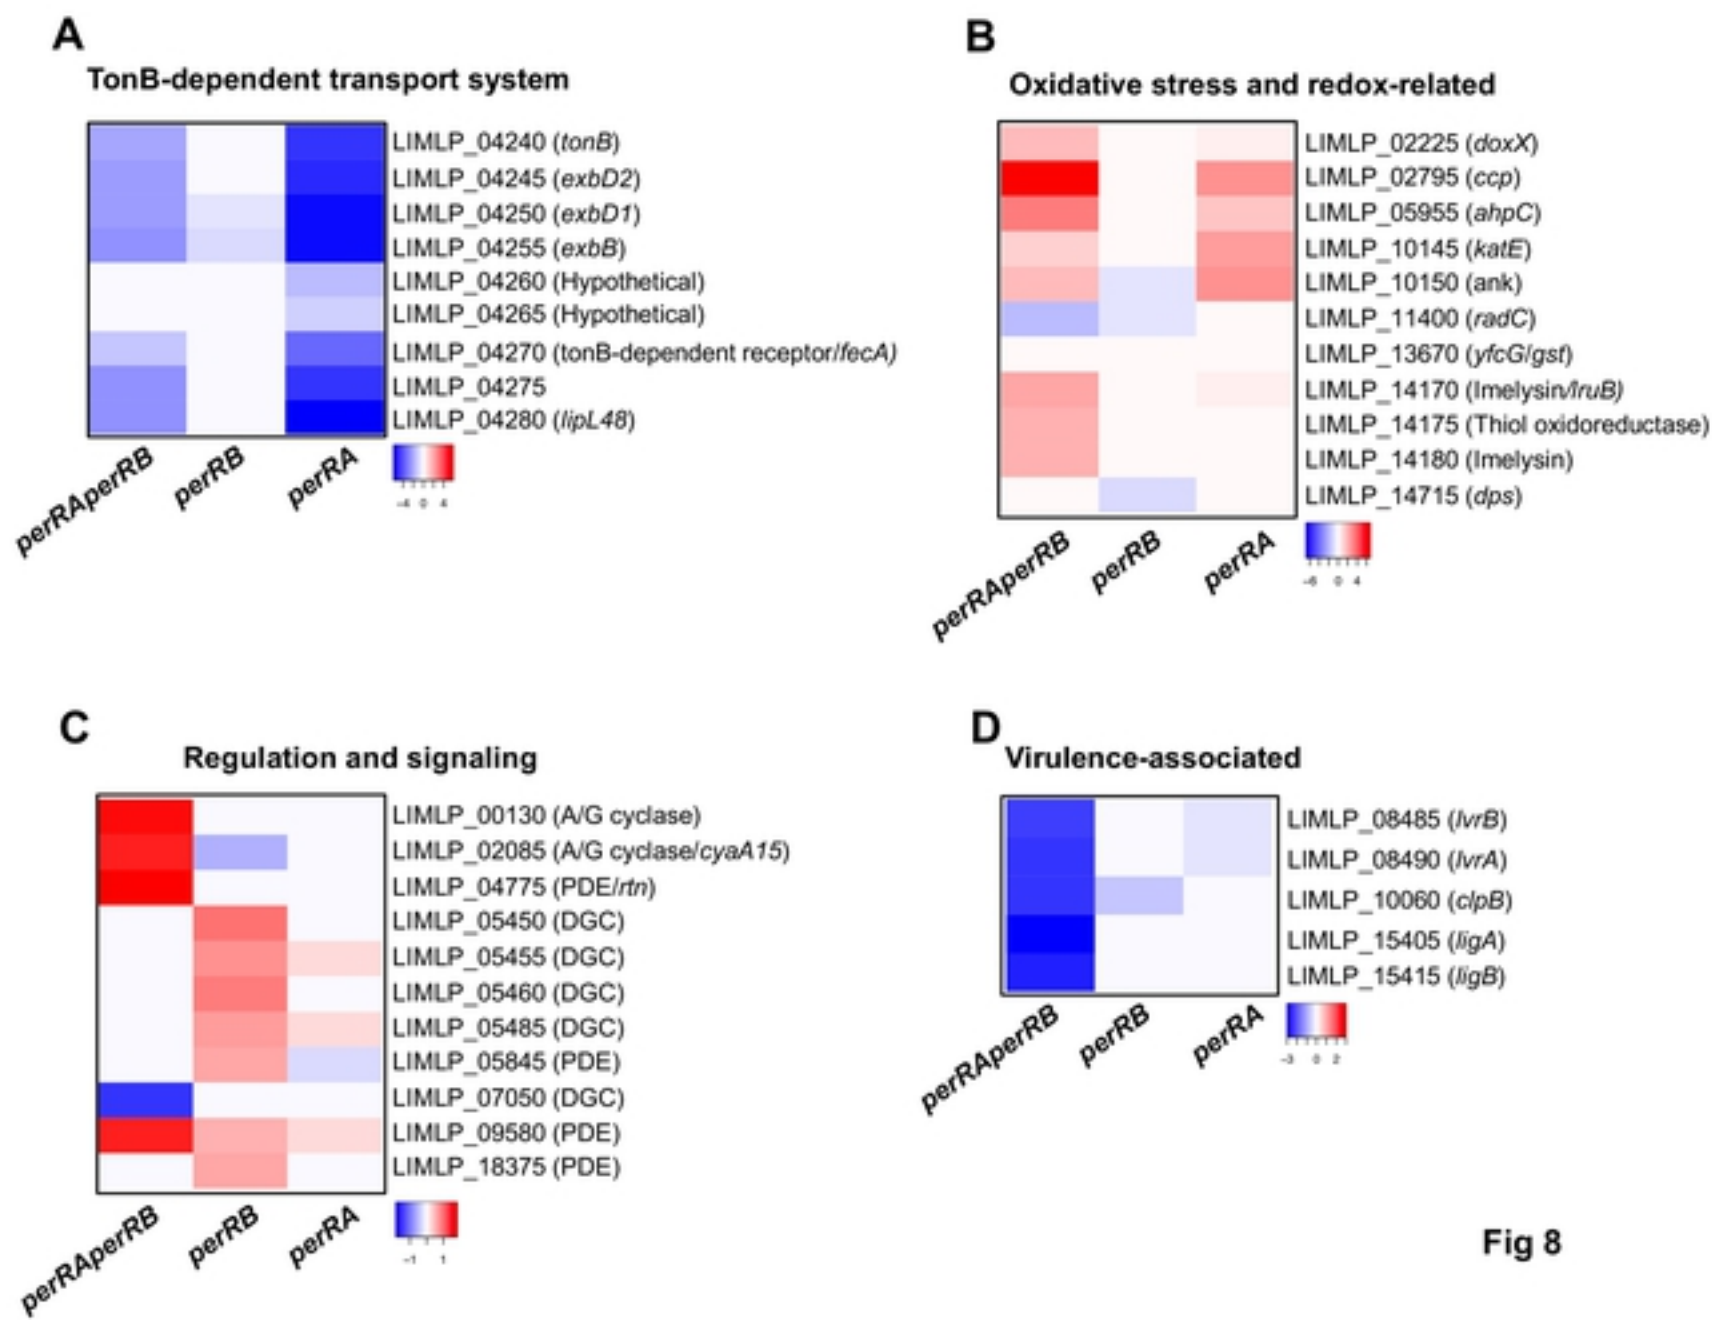

Fig 8

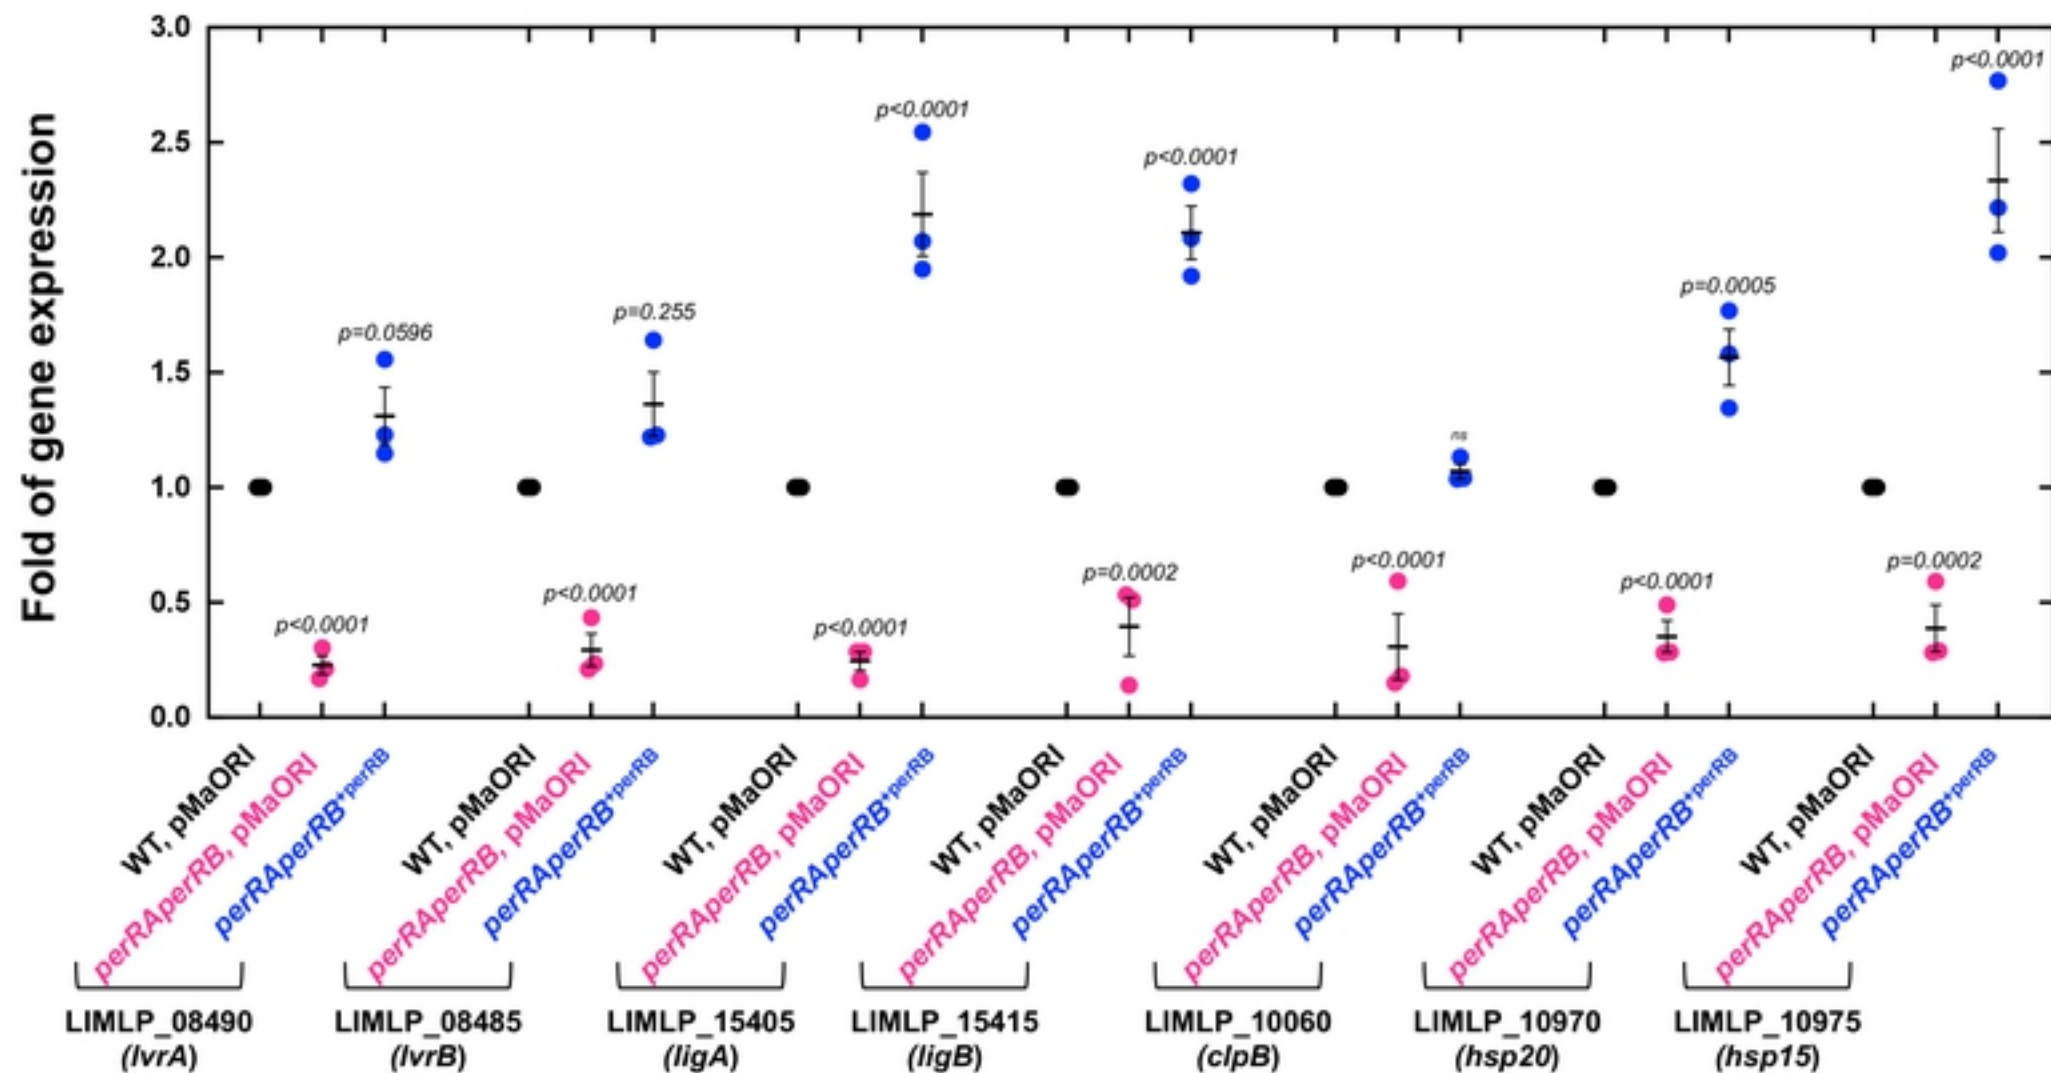

Fig 9

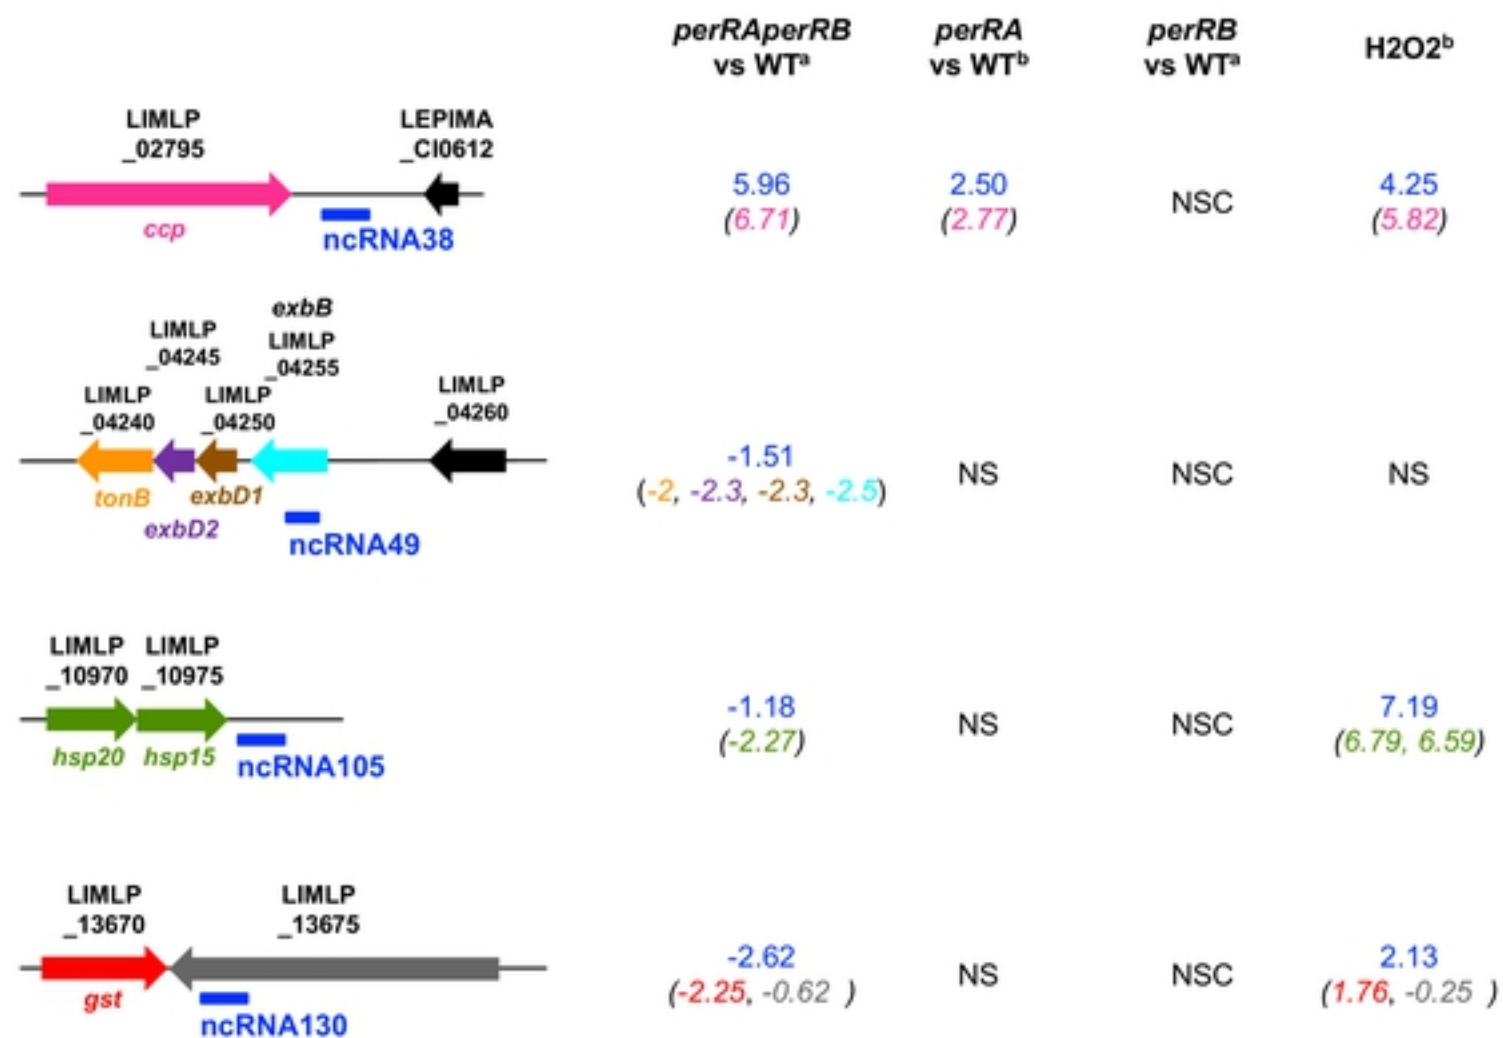

Fig 10
